# Supplementary material for: Nickel-catalyzed synthesis of (E)-olefins from benzylic alcohol derivatives and arylacetonitriles via C–O activation
Source: Royal Society of Chemistry journal article supplement (doi:10.1039/c5cc10005d), 2015-12-14

## ***Supporting Information***

# **Nickel-Catalyzed Synthesis of (*E*)-Olefins from Benzylic Alcohol Derivatives and Arylacetonitriles via C-O Activation**

Jing Xiao,<sup>1</sup> Jia Yang,<sup>1</sup> Tieqiao Chen,<sup>\*1</sup> Li-Biao Han<sup>\*2</sup>

E-mail: chentieqiao@hnu.edu.cn; libiao-han@aist.go.jp

<sup>1</sup>State Key Laboratory of Chemo/Biosensing and Chemometrics, College of Chemistry and Chemical Engineering, Hunan University, Changsha 410082, China.

<sup>2</sup>National Institute of Advanced Industrial Science and Technology (AIST), Tsukuba, Ibaraki 305-8565, Japan.

## **Table of Contents**

|                                                                                                                                                                 |         |
|-----------------------------------------------------------------------------------------------------------------------------------------------------------------|---------|
| <b>1. General information</b>                                                                                                                                   | S2      |
| <b>2. Synthesis of starting materials</b>                                                                                                                       | S2–S3   |
| <b>3. Typical procedure for the Nickel-catalyzed Synthesis of (<i>E</i>)-Olefins from Benzylic Alcohol Derivatives and Arylacetonitriles via C-O Activation</b> | S3      |
| <b>4. Characterization and analytical data of products</b>                                                                                                      | S3–S12  |
| <b>5. References</b>                                                                                                                                            | S13     |
| <b>6. Copies of <sup>1</sup>H NMR and <sup>13</sup>C NMR spectra</b>                                                                                            | S14–S38 |

## 1. General information

Unless otherwise noted, all reagents were purchased from commercial suppliers and used without purification. All solvents were dried by standard methods. Ni(COD)<sub>2</sub> and phosphine ligands are stored under nitrogen in the glove box. Unless otherwise noted, all coupling reactions were performed in 10-mL glass vessel tubes and carried out under N<sub>2</sub> atmosphere.

Flash column chromatography was performed using 200-300 mesh silica gel. Visualization on TLC was achieved by the use of UV light (254 nm). All reactions were monitored by GC, GC-MS. <sup>1</sup>H NMR, <sup>13</sup>C NMR spectra were measured on a Bruker Avance III-400 spectrometer. (<sup>1</sup>H 400 MHz, <sup>13</sup>C 101 MHz), using CDCl<sub>3</sub> as the solvent with tetramethylsilane (TMS) as the internal standard. Chemical shifts are reported in ppm and referenced to residual solvent peaks (CHCl<sub>3</sub> in CDCl<sub>3</sub>: 7.26 ppm for <sup>1</sup>H and 77.0 ppm for <sup>13</sup>C). The coupling constants *J* are given in Hz. Mass spectra were recorded by GCMS-QP2010 ultra spectrometer. The GC yields were accorded to the authentic samples/tridecane calibration standard from Shimadzu GC-2010 plus equipped with FID system.

## 2. Synthesis of starting materials

Substrates **1** were prepared according to the literature procedure.<sup>1,2</sup>

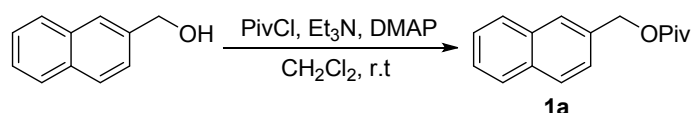

Typical procedure: To a solution of naphthalen-2-ylmethanol (3.16 g, 20 mmol) and 4,4-dimethylaminopyridine (DMAP, 10 mol%) in CH<sub>2</sub>Cl<sub>2</sub> (30 mL) was added triethylamine (3.35 mL, 24 mmol, 1.2 equiv) at room temperature. Then pivaloyl chloride (2.95 mL, 24 mmol, 1.2 equiv) was added dropwise over 3 min at 0 °C. After stirring for 15 min, the reaction mixture was quenched with saturated NaHCO<sub>3</sub> (10 mL), then the layers were separated. The aqueous layer was extracted with CH<sub>2</sub>Cl<sub>2</sub> (25 mL × 3) and the combined organic layer was dried over Na<sub>2</sub>SO<sub>4</sub> and then filtrated. After evaporation of the solvent under reduced pressure, the crude residue was purified by flash column chromatography (Petroleum ether/EtOAc = 10:1) to afford the product **1a** in 90% yield.

### 3. Typical procedure for the Nickel-catalyzed Synthesis of (*E*)-Olefins from Benzylic Alcohol Derivatives and Arylacetonitriles via C-O Activation

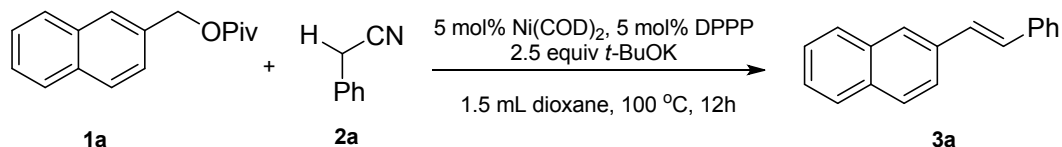

In a nitrogen-filled glove box, a 10 mL sealed schlenk tube equipped with a magnetic stir bar was charged with **1a** (0.1 mmol), Ni(COD)<sub>2</sub> (0.005 mmol), DPPP (0.005 mmol), *t*-BuOK (0.25 mmol) and **2a** (0.15 mmol) and dioxane (1.5 mL). The reaction mixture was stirred at 100 °C for 12 hours. After cooling the reaction mixture to room temperature, the mixture was passed through a short silica gel column with EtOAc as eluent. The filtrate was concentrated and the residue was further purified by column chromatography on silica gel to give the product **3a** in 81 % isolated yield (86% GC yield).

### 4. Characterization and analytical data of products (average yields based on two parallel reactions )

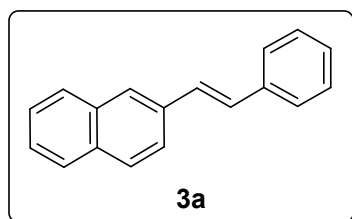

(*E*)-2-styrylnaphthalene **3a**, yield for pivalate 81%, 37.3 mg; yield for carbamate 65%, 29.9 mg; <sup>1</sup>H NMR (400 MHz CDCl<sub>3</sub>): δ 7.86–7.80 (m, 4H), 7.76–7.74 (m, 1H), 7.57 (d, *J* = 7.6 Hz, 2H), 7.50–7.43 (m, 2H), 7.39 (t, *J* = 7.6 Hz, 2H), 7.31–7.25 (m, 3H). <sup>13</sup>C NMR (100 MHz CDCl<sub>3</sub>): δ 137.38, 134.84, 133.73, 133.06, 129.05, 128.79, 128.75, 128.32, 128.01, 127.71, 126.64, 126.56, 126.35, 125.92, 123.53. This compound is known.<sup>1</sup>

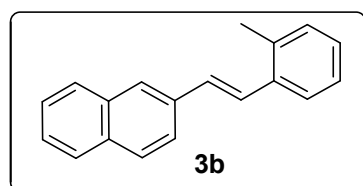

**(*E*)-2-(2-methylstyryl)naphthalene 3b**, yield 71%, 34.6 mg.  $^1\text{H}$  NMR (400 MHz  $\text{CDCl}_3$ ):  $\delta$  7.85–7.74 (m, 5H), 7.65 (d,  $J = 7.2$  Hz, 1H), 7.49–7.42 (m, 3H), 7.24–7.14 (m, 4H), 2.47 (s, 3H).  $^{13}\text{C}$  NMR (100 MHz  $\text{CDCl}_3$ ):  $\delta$  136.44, 135.88, 135.20, 133.75, 133.06, 130.48, 130.10, 128.32, 128.02, 127.72, 127.63, 126.86, 126.62, 126.36, 126.27, 125.91, 125.37, 123.64, 20.00. This compound is known.<sup>2</sup>

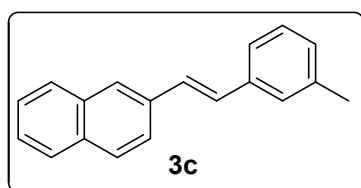

**(*E*)-2-(3-methylstyryl)naphthalene 3c**, yield 70%, 34.2 mg.  $^1\text{H}$  NMR (400 MHz  $\text{CDCl}_3$ ):  $\delta$  7.82–7.78 (m, 4H), 7.73–7.70 (m, 1H), 7.47–7.40 (m, 2H), 7.36–7.34 (m, 2H), 7.27–7.20 (m, 3H), 7.08 (d,  $J = 19.0$  Hz, 1H), 2.38 (s, 3H).  $^{13}\text{C}$  NMR (100 MHz  $\text{CDCl}_3$ ):  $\delta$  138.31, 137.35, 134.98, 133.78, 133.07, 129.19, 128.68, 128.62, 128.58, 128.34, 128.05, 127.76, 127.32, 126.62, 126.37, 125.91, 123.81, 123.58, 21.53. This compound is known.<sup>3</sup>

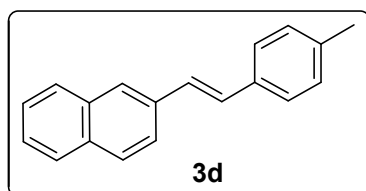

**(*E*)-2-(4-methylstyryl)naphthalene 3d**, yield 79%, 38.6 mg.  $^1\text{H}$  NMR (400 MHz  $\text{CDCl}_3$ ):  $\delta$  7.82–7.70 (m, 5H), 7.45–7.40 (m, 4H), 7.20–7.16 (m, 4H), 2.36 (s, 3H).  $^{13}\text{C}$  NMR (100 MHz  $\text{CDCl}_3$ ):  $\delta$  137.63, 135.07, 134.63, 133.79, 132.99, 129.48, 129.02, 128.29, 127.99, 127.82, 127.72, 126.51, 126.41, 126.32, 125.81, 123.56, 21.31. This compound is known.<sup>4</sup>

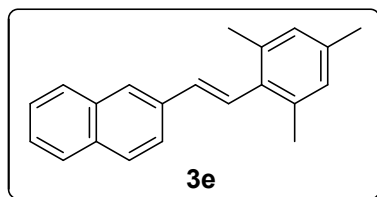

**(*E*)-2-(2,4,6-trimethylstyryl)naphthalene 3e**, yield 91%, 49.5 mg;  $^1\text{H}$  NMR (400 MHz  $\text{CDCl}_3$ ):  $\delta$  7.80–7.72 (m, 5H), 7.46–7.42 (m, 2H), 7.25–7.17 (m, 1H), 6.92–6.91 (m, 2H), 6.77–6.72 (m, 1H), 2.39–2.37 (m, 6H), 2.31–2.69 (m, 3H).  $^{13}\text{C}$  NMR (100 MHz  $\text{CDCl}_3$ ):  $\delta$  136.44, 136.28, 135.29, 134.11, 133.83, 133.07, 128.89, 128.35, 128.04, 127.79, 127.41, 126.41, 126.22, 125.88, 123.46, 21.18, 21.09. This compound is known.<sup>5</sup>

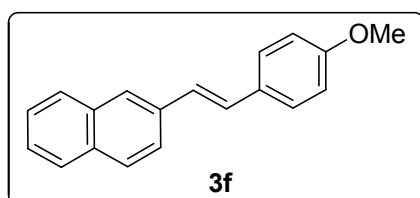

**(*E*)-2-(4-methoxystyryl)naphthalene 3f**, yield 85%, 44.2 mg.  $^1\text{H}$  NMR (400 MHz  $\text{CDCl}_3$ ):  $\delta$  7.80–7.69 (m, 5H), 7.49–7.41 (m, 4H), 7.22–7.09 (m, 2H), 6.90 (d,  $J$  = 8.4 Hz, 2H), 3.81 (s, 3H).  $^{13}\text{C}$  NMR (100 MHz  $\text{CDCl}_3$ ):  $\delta$  159.41, 135.20, 133.81, 132.89, 130.21, 128.61, 128.26, 127.93, 127.79, 127.70, 126.72, 126.29, 126.13, 125.70, 123.51, 114.22, 55.35. This compound is known.<sup>4</sup>

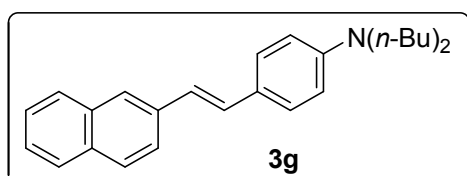

**(*E*)-N,N-dibutyl-4-(2-(naphthalen-2-yl)vinyl)aniline 3g**, yield 58%, 41.5 mg.  $^1\text{H}$  NMR (400 MHz  $\text{CDCl}_3$ ):  $\delta$  7.80–7.70 (m, 5H), 7.45–7.37 (m, 4H), 7.16 (d,  $J$  = 16.0

Hz, 1H), 7.03 (d,  $J = 16.4$  Hz, 1H), 6.64 (d,  $J = 8.4$  Hz, 2H), 3.29 (t,  $J = 7.6$  Hz, 4H), 1.59–1.55 (m, 4H), 1.39–1.32 (m, 4H), 0.96 (t,  $J = 7.2$  Hz, 6H).  $^{13}\text{C}$  NMR (100 MHz  $\text{CDCl}_3$ ):  $\delta$  147.92, 135.93, 133.92, 132.59, 129.35, 128.11, 127.85, 127.80, 127.67, 126.17, 125.36, 125.31, 124.51, 123.69, 123.58, 111.69, 50.83, 29.53, 20.39, 14.05.

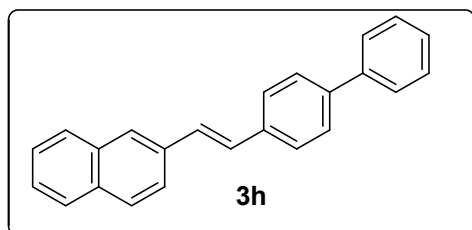

**(*E*)-2-(2-([1,1'-biphenyl]-4-yl)vinyl)naphthalene 3h**, yield 61%, 37.4 mg.  $^1\text{H}$  NMR (400 MHz  $\text{CDCl}_3$ ):  $\delta$  7.81–7.69 (m, 6H), 7.58–7.56 (m, 6H), 7.33–7.27 (m, 2H), 7.23 (d,  $J = 8.0$  Hz, 2H), 7.19 (s, 2H).  $^{13}\text{C}$  NMR (100 MHz  $\text{CDCl}_3$ ):  $\delta$  139.68, 139.40, 135.43, 133.85, 132.74, 132.07, 127.84, 127.80, 127.55, 127.33, 127.00, 126.70, 126.39, 126.34, 125.96, 125.92, 125.64, 125.35, 124.91, 122.52. This compound is known.<sup>6</sup>

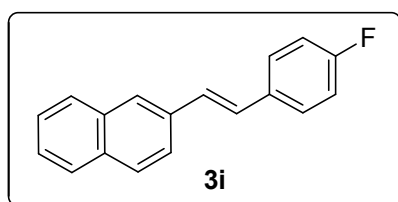

**(*E*)-2-(4-fluorostyryl)naphthalene 3i**, yield 70%, 34.7 mg.  $^1\text{H}$  NMR (400 MHz  $\text{CDCl}_3$ ):  $\delta$  7.83–7.81 (m, 4H), 7.71 (d,  $J = 8.8$  Hz, 1H), 7.53–7.44 (m, 4H), 7.18 (s, 2H), 7.07 (t,  $J = 8.8$  Hz, 2H).  $^{13}\text{C}$  NMR (100 MHz  $\text{CDCl}_3$ ):  $\delta$  162.40 (d,  $J_{\text{C-F}} = 245.9$  Hz), 134.68, 133.72, 133.57 (d,  $J_{\text{C-F}} = 3.4$  Hz), 133.07, 128.59 (d,  $J_{\text{C-F}} = 2.3$  Hz), 128.37, 128.07, 127.99, 127.82, 127.73, 126.59, 126.40, 125.96, 123.43, 115.69 (d,  $J_{\text{C-F}} = 21.5$  Hz). This compound is known.<sup>7</sup>

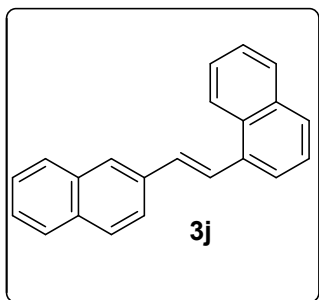

**(*E*)-1-(2-(naphthalen-2-yl)vinyl)naphthalene 3j**, yield 76%, 42.6 mg.  $^1\text{H}$  NMR (400 MHz  $\text{CDCl}_3$ ):  $\delta$  8.27 (d,  $J = 8.0$  Hz, 1H), 8.00 (d,  $J = 16.0$  Hz, 1H), 7.91–7.78 (m, 8H), 7.57–7.43 (m, 5H), 7.31 (d,  $J = 16.0$  Hz, 1H).  $^{13}\text{C}$  NMR (100 MHz  $\text{CDCl}_3$ ):  $\delta$  135.15, 135.06, 133.82, 133.78, 133.16, 131.85, 131.46, 128.69, 128.42, 128.13, 128.09, 127.77, 126.82, 126.42, 126.16, 126.11, 126.02, 125.89, 125.76, 123.83, 123.73, 123.65. This compound is known.<sup>8</sup>

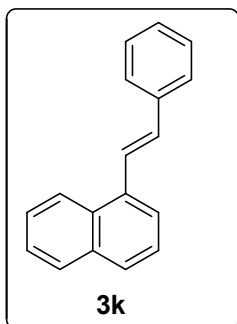

**(*E*)-1-styrylnaphthalene 3k**, yield 75%, 34.5 mg.  $^1\text{H}$  NMR (400 MHz  $\text{CDCl}_3$ ):  $\delta$  8.21 (d,  $J = 8.0$  Hz, 1H), 7.90–7.85 (m, 2H), 7.79 (d,  $J = 8.4$  Hz, 1H), 7.74 (d,  $J = 6.8$  Hz, 1H), 7.60 (d,  $J = 7.6$  Hz, 2H), 7.53–7.38 (m, 3H), 7.40 (t,  $J = 7.2$  Hz, 2H), 7.29 (t,  $J = 7.2$  Hz, 1H), 7.16–7.07 (m, 1H).  $^{13}\text{C}$  NMR (100 MHz  $\text{CDCl}_3$ ):  $\delta$  137.67, 135.07, 133.78, 131.82, 131.45, 128.80, 128.66, 128.08, 127.82, 126.73, 126.13, 125.87, 125.86, 125.74, 123.82, 123.67. This compound is known.<sup>9</sup>

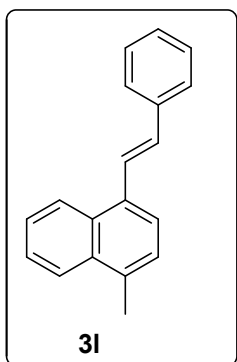

**(E)-1-methyl-4-styrylnaphthalene 3l**, yield 63%, 30.7 mg.  $^1\text{H}$  NMR (400 MHz  $\text{CDCl}_3$ ):  $\delta$  8.22–8.20 (m, 1H), 8.02–7.99 (m, 1H), 7.88–7.81 (m, 1H), 7.63–7.50 (m, 5H), 7.39–7.24 (m, 4H), 7.11–7.04 (m, 1H), 2.69 (s, 3H).  $^{13}\text{C}$  NMR (100 MHz  $\text{CDCl}_3$ ): 137.84, 134.43, 133.48, 132.81, 131.54, 131.12, 128.80, 127.68, 126.68, 126.13, 125.80, 125.74, 124.77, 124.41, 123.47, 19.72. This compound is known.<sup>10</sup>

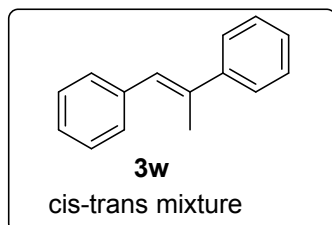

**(E)-prop-1-ene-1,2-diylidibenzene 3m (cis-trans mixture)**, yield 46%, 22.5 mg.  $^1\text{H}$  NMR (400 MHz  $\text{CDCl}_3$ ):  $\delta$  7.85–7.82 (m, 2H), 7.69–7.67 (m, 0.5H), 7.62–7.56 (m, 1.5H), 7.51–7.46 (m, 2.5H), 7.41–7.21 (m, 5H), 7.00–6.99 (m, 1H), 6.64 (s, 0.5H), 2.36–2.26 (m, 3H). This compound is known.<sup>7</sup>

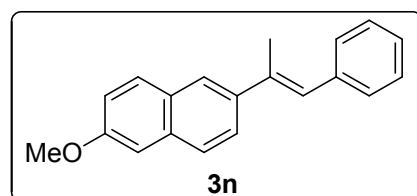

**(E)-2-methoxy-6-(1-phenylprop-1-en-2-yl)naphthalene 3n**, yield 40%, 21.9 mg.  $^1\text{H}$  NMR (400 MHz  $\text{CDCl}_3$ ): 7.86 (s, 1H), 7.76–7.69 (m, 3H), 7.40–7.36 (m, 4H), 7.26–7.25 (m, 1H), 7.16–7.13 (m, 2H), 6.97 (s, 1H), 3.92 (s, 3H), 2.37 (s, 3H).  $^{13}\text{C}$  NMR (100 MHz  $\text{CDCl}_3$ ):  $\delta$  157.72, 138.94, 138.53, 137.22, 133.85, 129.71, 129.24, 128.94, 128.21, 127.51, 126.70, 126.45, 124.90, 124.58, 118.98, 105.66, 55.34, 17.48. This compound is known.<sup>11</sup>

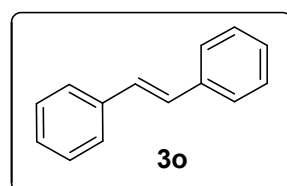

**(E)-1,2-diphenylethene 3o**, yield 73%, 26.3 mg;  $^1\text{H}$  NMR (400 MHz  $\text{CDCl}_3$ ):  $\delta$  7.50

(d,  $J = 7.6$  Hz, 4H), 7.34 (dd,  $J = 7.6$  Hz, 7.6 Hz, 4H), 7.24 (t,  $J = 7.6$  Hz, 2H), 7.10 (s, 2H).  $^{13}\text{C}$  NMR (100 MHz  $\text{CDCl}_3$ ):  $\delta$  137.40, 128.76, 127.69, 126.59. This compound is known.<sup>1</sup>

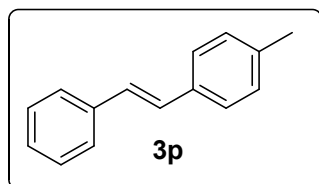

**(*E*)-1-methyl-4-styrylbenzene 3p**, for benzyl pivalate: yield 77%, 29.9 mg; for 4-methylbenzyl pivalate: yield 75%, 29.1 mg.  $^1\text{H}$  NMR (400 MHz  $\text{CDCl}_3$ ):  $\delta$  7.49 (d,  $J = 8.0$  Hz, 2H), 7.40 (d,  $J = 8.0$  Hz, 2H), 7.34 (t,  $J = 7.6$  Hz, 2H), 7.23 (t,  $J = 7.6$  Hz, 1H), 7.15 (d,  $J = 8.0$  Hz, 2H), 7.06 (d,  $J = 2.4$  Hz, 2H), 2.35 (s, 3H).  $^{13}\text{C}$  NMR (100 MHz  $\text{CDCl}_3$ ):  $\delta$  137.57, 137.55, 134.60, 129.44, 128.69, 128.67, 127.75, 127.45, 126.48, 126.44, 21.29. This compound is known.<sup>1</sup>

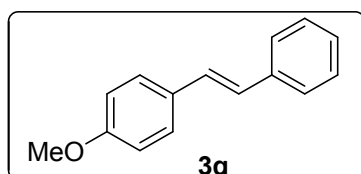

**(*E*)-1-methoxy-4-styrylbenzene 3q**, yield 61%, 25.6 mg.  $^1\text{H}$  NMR (400 MHz  $\text{CDCl}_3$ ):  $\delta$  7.49–7.44 (m, 4H), 7.34 (t,  $J = 7.6$  Hz, 2H), 7.25–7.23 (m, 1H), 7.06 (d,  $J = 16.4$  Hz, 1H), 6.97 (d,  $J = 16.4$  Hz, 1H), 6.90 (d,  $J = 8.8$  Hz, 2H), 3.82 (s, 3H).  $^{13}\text{C}$  NMR (100 MHz  $\text{CDCl}_3$ ):  $\delta$  159.33, 137.67, 130.17, 128.67, 128.23, 127.74, 127.23, 126.64, 126.28, 114.16, 55.35. This compound is known.<sup>4</sup>

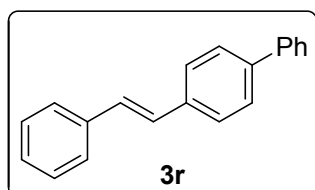

**(*E*)-4-styryl-1,1'-biphenyl 3r**, yield 53%, 27.1 mg;  $^1\text{H}$  NMR (400 MHz  $\text{CDCl}_3$ ):  $\delta$  7.63–7.59 (m, 6H), 7.53 (d,  $J = 7.6$  Hz, 2H), 7.44 (t,  $J = 8.0$  Hz, 2H), 7.38–7.35 (m, 3H), 7.28–7.24 (m, 1H), 7.15 (s, 2H).  $^{13}\text{C}$  NMR (100 MHz  $\text{CDCl}_3$ ):  $\delta$  140.70, 140.37, 137.36, 136.42, 128.83, 128.78, 128.73, 128.23, 127.68, 127.38, 127.36, 126.97, S9

126.95, 126.56. This compound is known.<sup>12</sup>

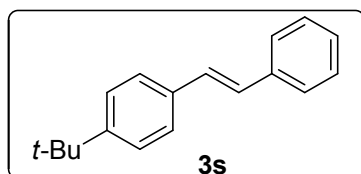

**(*E*)-1-(tert-butyl)-4-styrylbenzene 3s**, yield 62%, 29.3 mg. <sup>1</sup>H NMR (400 MHz CDCl<sub>3</sub>): 7.52–7.45 (m, 4H), 7.39–7.33 (m, 4H), 7.26–7.22 (m, 1H), 7.13–7.09 (m, 2H), 1.33 (s, 9H). <sup>13</sup>C NMR (100 MHz CDCl<sub>3</sub>): δ 150.82, 137.58, 134.60, 128.67, 128.53, 127.96, 127.44, 126.44, 126.28, 125.64, 34.66, 31.33. This compound is known.<sup>7</sup>

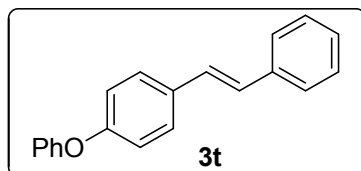

**(*E*)-1-phenoxy-4-styrylbenzene 3t**, yield 74%, 40.3 mg. <sup>1</sup>H NMR (400 MHz CDCl<sub>3</sub>): δ 7.48(d, *J* = 8.0 Hz, 2H), 7.36–7.23 (m, 7H), 7.17–7.03 (m, 6H), 6.90 (d, *J* = 8.0 Hz, 1H). <sup>13</sup>C NMR (100 MHz CDCl<sub>3</sub>): δ 157.62, 157.26, 139.32, 137.08, 129.98, 129.83, 129.50, 128.74, 128.07, 127.85, 126.63, 123.31, 121.69, 118.91, 118.17, 116.75. This compound is known.<sup>13</sup>

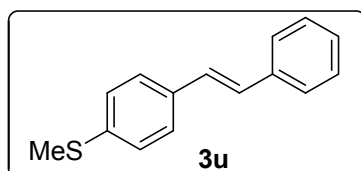

**(*E*)-methyl(4-styrylphenyl)sulfane 3u**, yield 45%, 20.3 mg. <sup>1</sup>H NMR (400 MHz CDCl<sub>3</sub>): 7.50 (d, *J* = 7.6 Hz, 2H), 7.43 (d, *J* = 8.4 Hz, 2H), 7.35 (t, *J* = 7.6 Hz, 2H), 7.25–7.23 (m, 3H), 7.06 (s, 2H), 2.50 (s, 3H). <sup>13</sup>C NMR (100 MHz CDCl<sub>3</sub>): δ 137.85, 137.32, 134.31, 128.69, 128.09, 128.03, 127.56, 126.89, 126.73, 126.43, 15.84. This compound is known.<sup>4</sup>

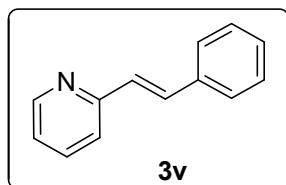

**(*E*)-2-styrylpyridine 3v**, yield 61%, 22.1 mg;  $^1\text{H}$  NMR (400 MHz  $\text{CDCl}_3$ ):  $\delta$  8.60 (d,  $J = 4.4$  Hz, 1H), 7.68–7.58 (m, 4H), 7.42–7.36 (m, 3H), 7.32–7.28 (m, 1H), 7.21–7.16 (m, 2H).  $^{13}\text{C}$  NMR (100 MHz  $\text{CDCl}_3$ ):  $\delta$  155.49, 149.38, 136.83, 136.57, 133.10, 128.75, 128.45, 127.60, 127.17, 122.14, 122.12. This compound is known.<sup>9</sup>

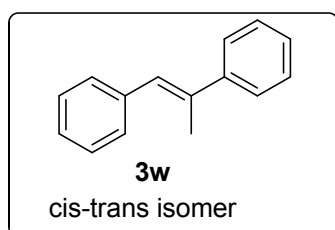

**(*E*)-prop-1-ene-1,2-diyl dibenzene 3w**, yield 64%, 24.8 mg;  $^1\text{H}$  NMR (400 MHz  $\text{CDCl}_3$ ):  $\delta$  7.53–7.51 (m, 1.2H), 7.39–7.17 (m, 7H), 7.10–7.05 (m, 1H), 6.95–6.93 (m, 0.8H), 6.84–6.47 (m, 1H), 2.28–2.20 (m, 3H). This compound is known.<sup>1</sup>

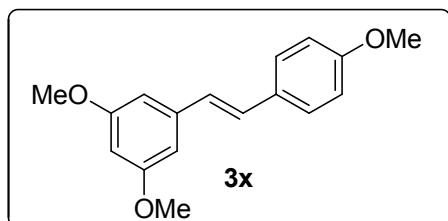

**(*E*)-1,3-dimethoxy-5-(4-methoxystyryl)benzene 3x**, yield 92%, 49.7 mg.  $^1\text{H}$  NMR (400 MHz  $\text{CDCl}_3$ ):  $\delta$  7.44 (d,  $J = 8.8$  Hz, 2H), 7.04 (d,  $J = 16.0$  Hz, 1H), 6.90 (d,  $J = 16.0$  Hz, 1H), 6.89 (d,  $J = 8.8$  Hz, 2H), 6.65 (d,  $J = 2.0$  Hz, 2H), 6.37 (t,  $J = 2.0$  Hz, 1H), 3.82 (s, 9H).  $^{13}\text{C}$  NMR (100 MHz  $\text{CDCl}_3$ ):  $\delta$  160.99, 159.42, 139.72, 129.95, 128.76, 127.82, 126.59, 114.16, 104.35, 99.64, 55.37, 55.34. This compound is known.<sup>14</sup>

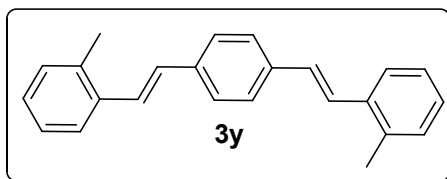

**1,4-bis((E)-2-methylstyryl)benzene 3y**, yield 62%, 38.4 mg.  $^1\text{H}$  NMR (400 MHz  $\text{CDCl}_3$ ):  $\delta$  7.61 (d,  $J = 7.2$  Hz, 2H), 7.53 (s, 4H), 7.38 – 7.34 (m, 2H), 7.22 – 7.19 (m, 6H), 7.03 – 6.99 (m, 2H), 2.45 (s, 6H).  $^{13}\text{C}$  NMR (100 MHz  $\text{CDCl}_3$ ):  $\delta$  137.04, 136.36, 135.86, 130.48, 129.56, 127.61, 126.92, 126.37, 126.26, 125.29, 20.00. This compound is known.<sup>15</sup>

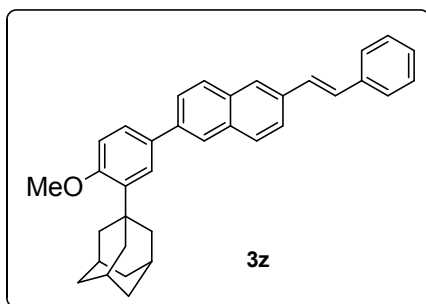

**(3r,5r,7r)-1-(2-methoxy-5-(6-((E)-styryl)naphthalen-2-yl)phenyl)adamantane 3z**, yield 40%, 37.6 mg.  $^1\text{H}$  NMR (400 MHz  $\text{CDCl}_3$ ):  $\delta$  7.96 (s, 1H), 7.88 – 7.86 (m, 3H), 7.77 – 7.72 (m, 2H), 7.60 – 7.52 (m, 4H), 6.39 (t,  $J = 7.6$  Hz, 2H), 7.31 – 7.26 (m, 3H), 6.99 (d,  $J = 8.4$  Hz, 1H), 3.90 (s, 3H), 2.19 (s, 6H), 2.11 (s, 3H), 1.81 (s, 6H).  $^{13}\text{C}$  NMR (100 MHz  $\text{CDCl}_3$ ):  $\delta$  158.62, 139.05, 138.90, 137.45, 134.51, 133.42, 133.09, 132.49, 128.87, 128.78, 128.74, 128.47, 128.35, 127.63, 126.54, 126.40, 126.14, 125.85, 125.53, 124.85, 123.85, 112.12, 61.75, 55.19, 40.65, 37.17, 29.16.

## 5. References

- (1) S. Wu, H. Ma, X. Jia, Y. Zhong and Z. Lei, *Tetrahedron*, 2001, **67**, 250.
- (2) W. H. Laarhoven, *Pure Appl. Chem.*, 1984, **56**, 1225.
- (3) R. Lapouyade, A. Veyres, N. Hanafi, A. Couture and A. Lablache-Combier, *J. Org. Chem.*, 1982, **47**, 1361.
- (4) S. Keesara, S. Parvathaneni and M. R. Mandapati, *Tetrahedron Lett.*, 2014, **55**, 6769.
- (5) E. V. Blackburn, C. E. Loader and C. J. Timmons, *J. Chem. Soc. (C)*, 1970, 163.
- (6) K. Y. Amsharov, M. A. Kabdulov and M. Jansen, *Eur. J. Org. Chem.*, 2009, 6328.
- (7) A. R. Ehle , Q. Zhou and M. P. Watson, *Org. Lett.*, 2012, **14**, 1202.
- (8) L. Liu, B. Yang, T. J. Katz and M. K. Poindexter, *J. Org. Chem.*, 1991, **56**, 3769.
- (9) Vadapalli Chandrasekhar , Ramakirushnan Suriya Narayanan, *Tetrahedron Lett.*, 2011, **52**, 3527.
- (10) W. H. Laarhoven, T.H.J.H.M. Cuppen and R.J.F. Nivard, *Tetrahedron*, 1970, **26**, 1970, 4865.
- (11) A. M. Seligman and A. M. Rutenburg, *J. Am. Chem. Soc.*, 1950, **72**, 3214.
- (12) X. Cui, J. Li, Z.-P. Zhang, Y. Fu, L. Liu and Q.-X. Guo, *J. Org. Chem.*, 2007, **72**, 9342.
- (13) M. Oberholzera and C. M. Frech, *Green Chem.*, 2013, **15**, 1678.
- (14) K. Ferré-Filmon, L. Delaude, A. Demonceau and A. F. Noels, *Eur. J. Org. Chem.*, 2005, 3319.
- (15) V. K. Koul, and B. R. Hirani, Indian 2006MU01558, patent, Sep. 19 2008.

## 6. Copies of $^1\text{H}$ NMR and $^{13}\text{C}$ NMR spectra

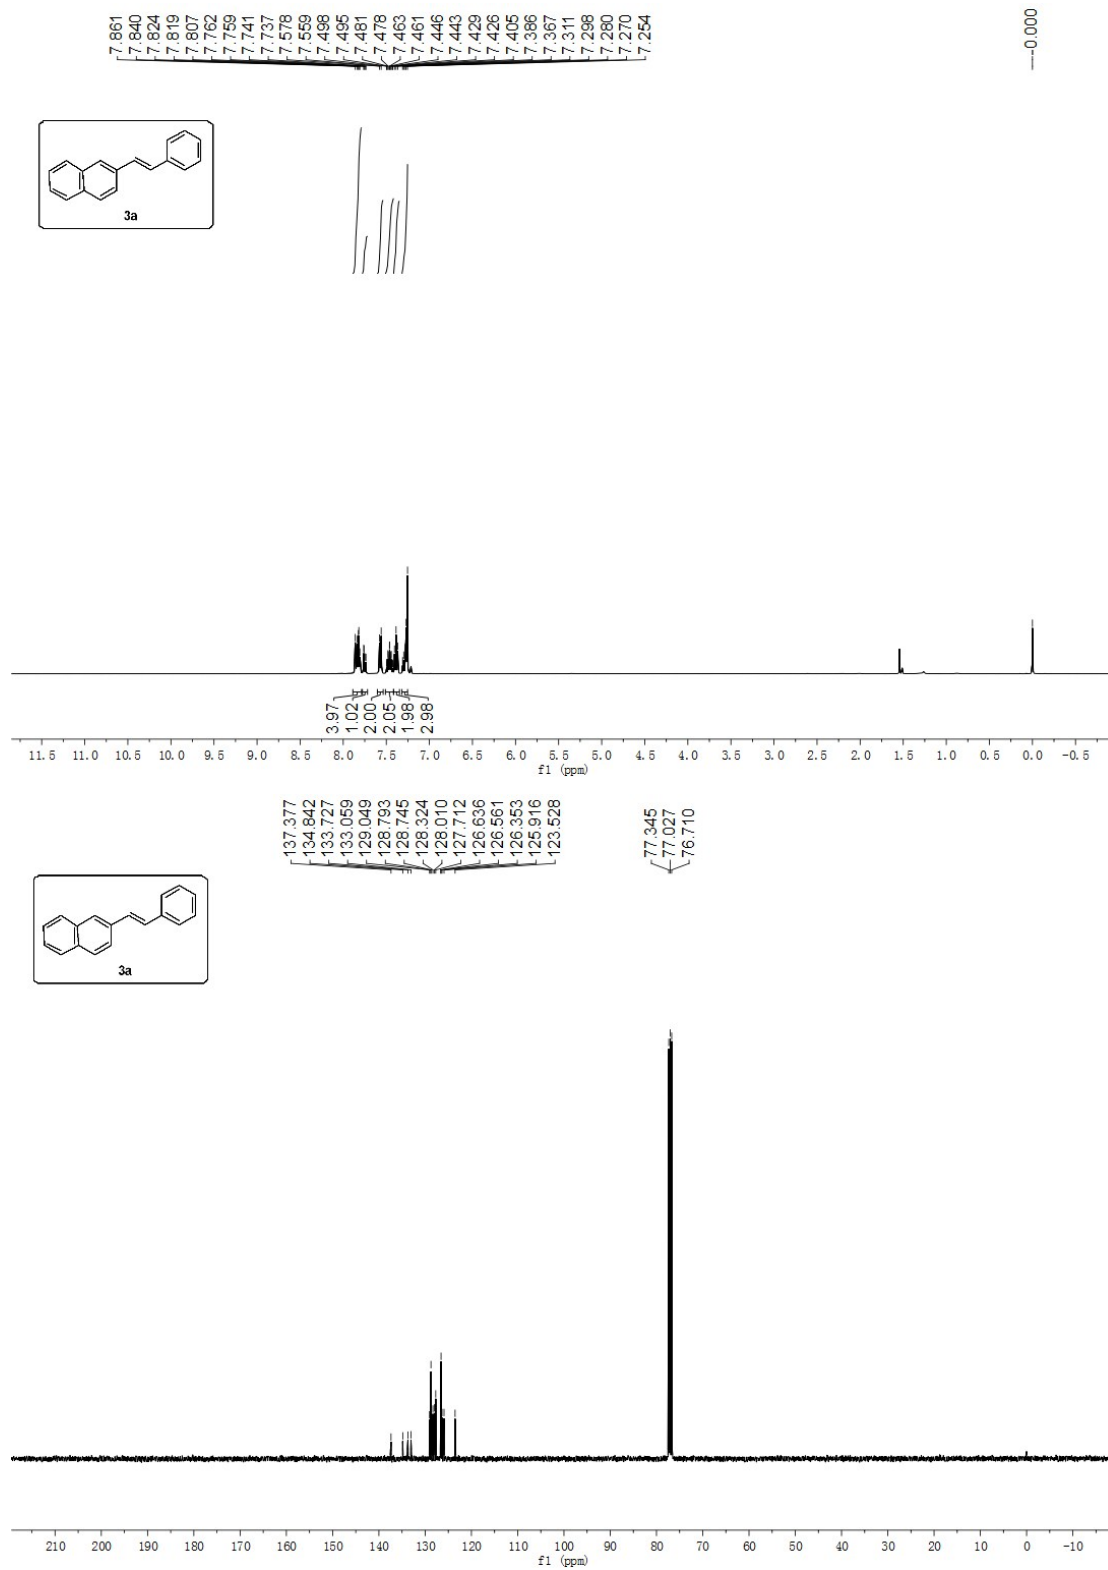

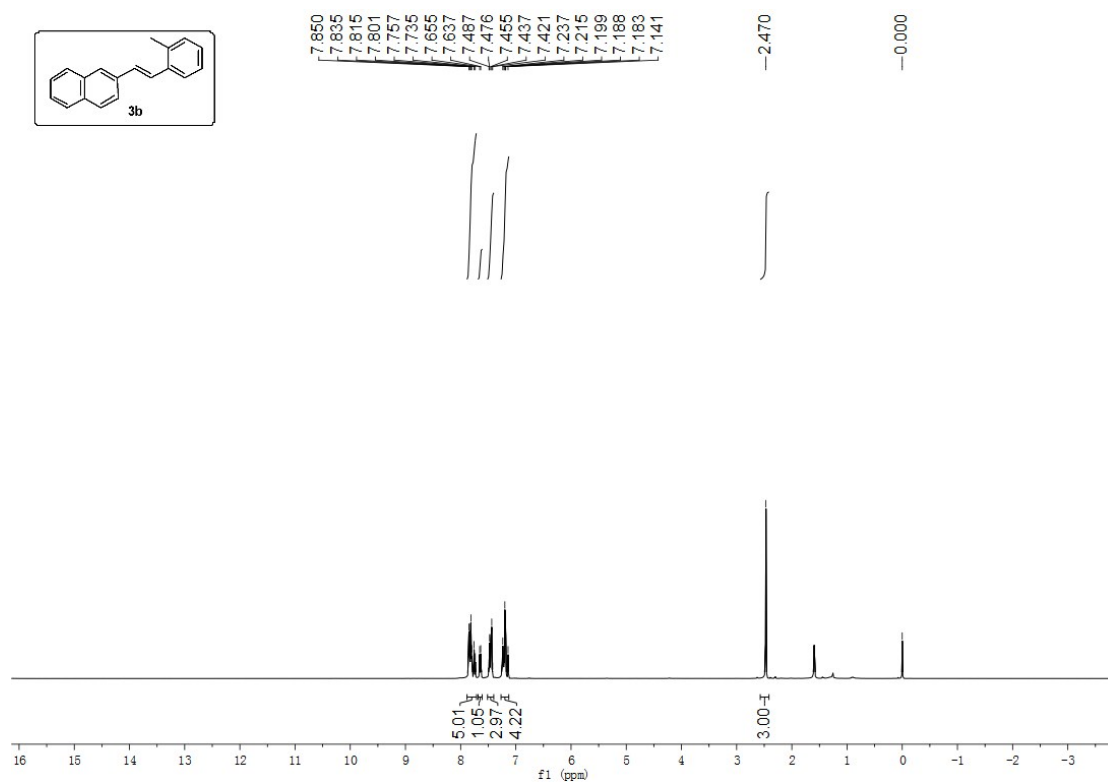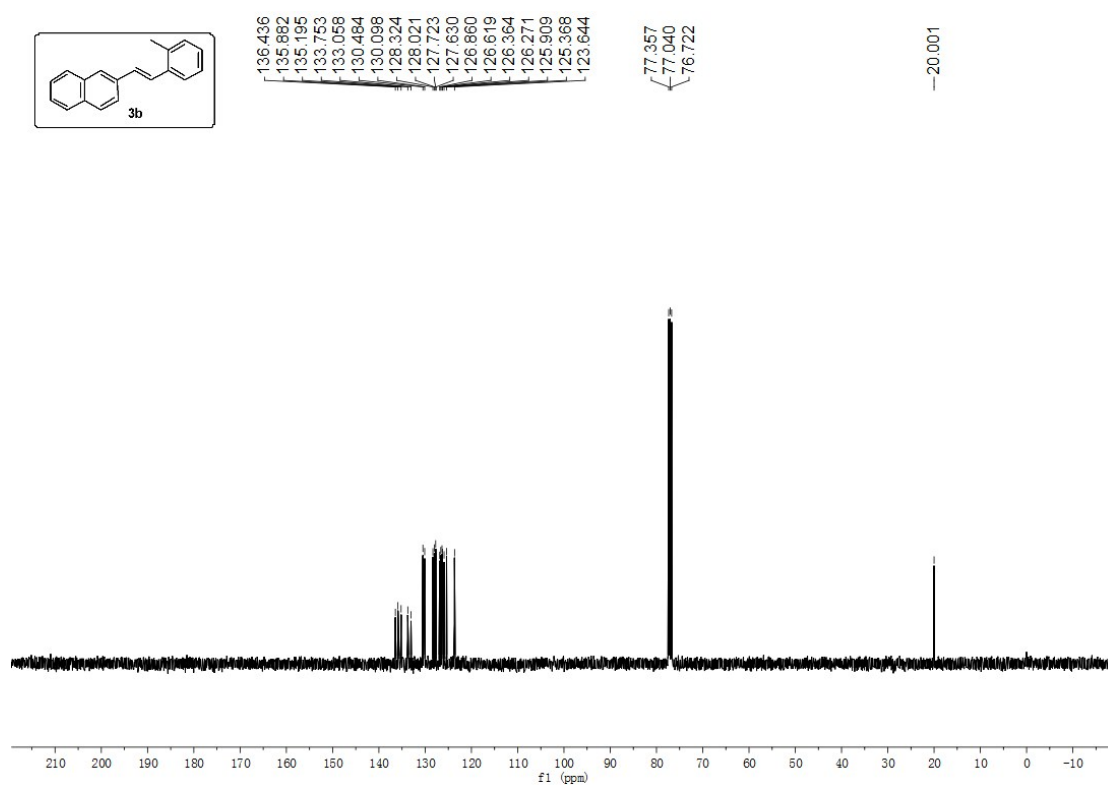

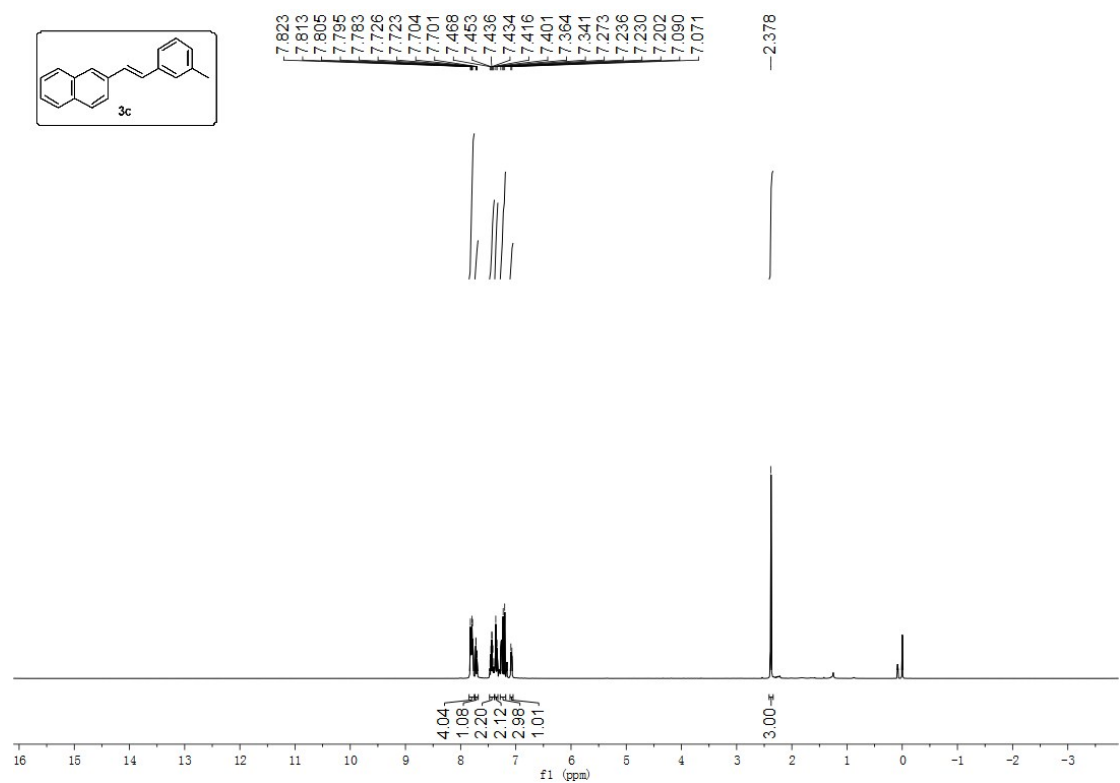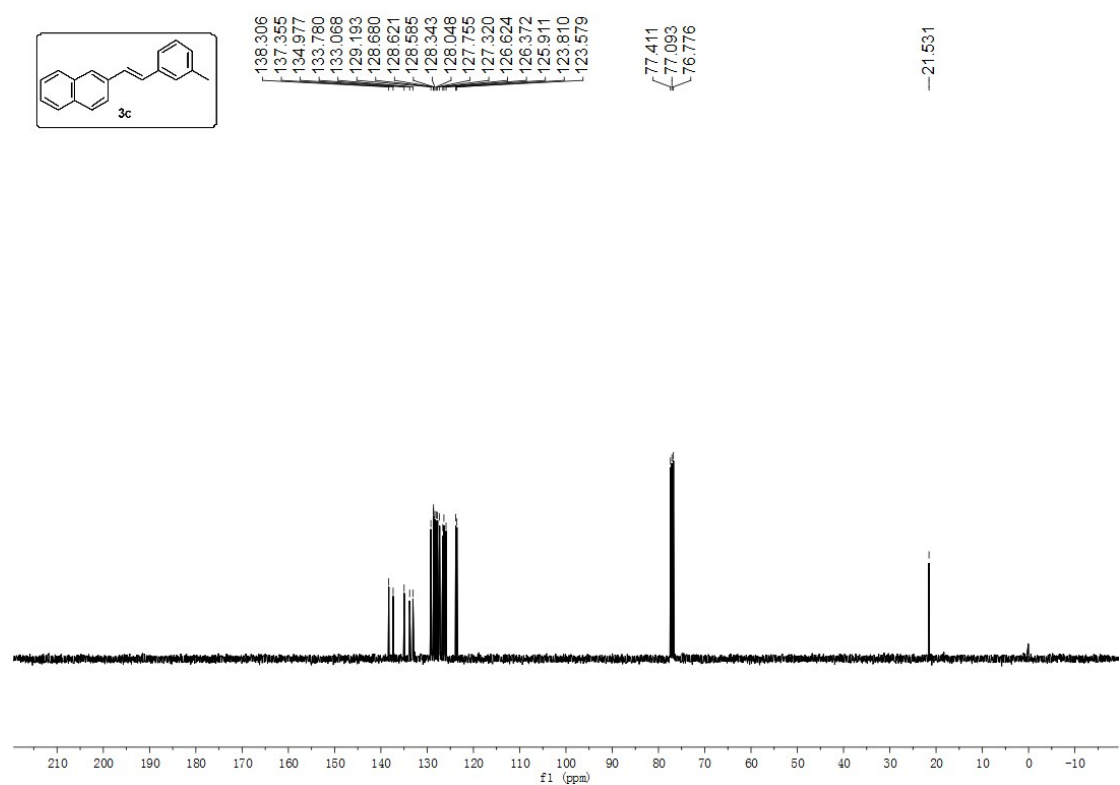

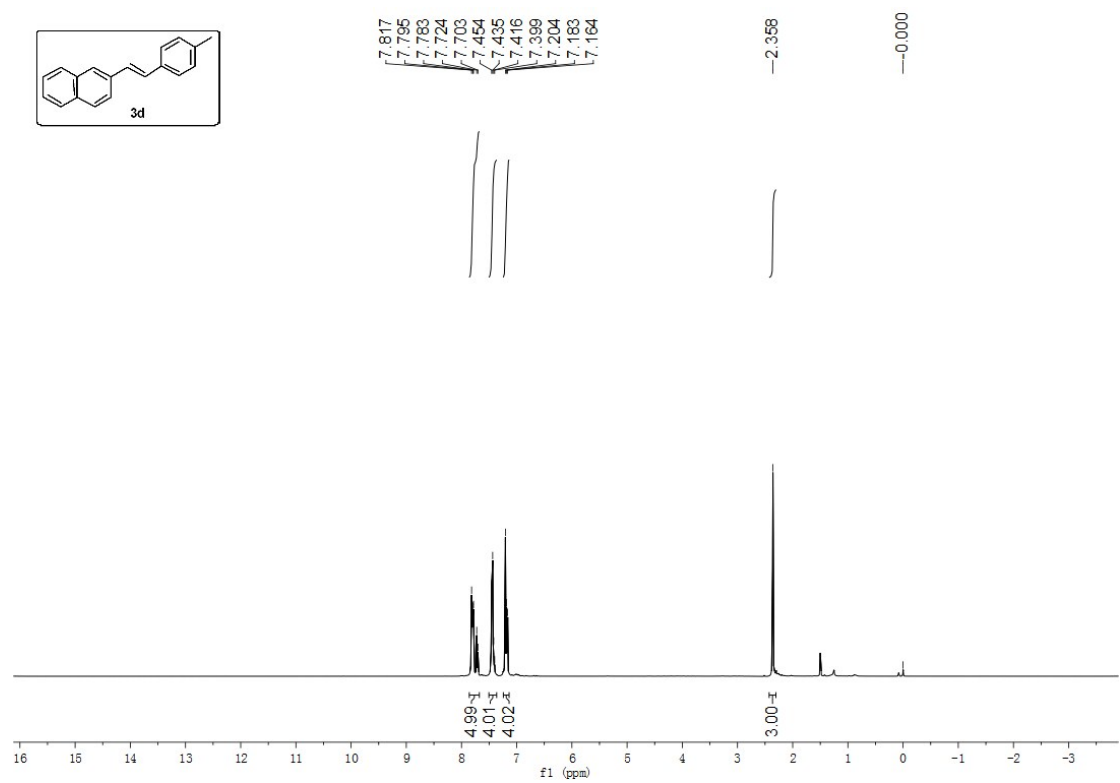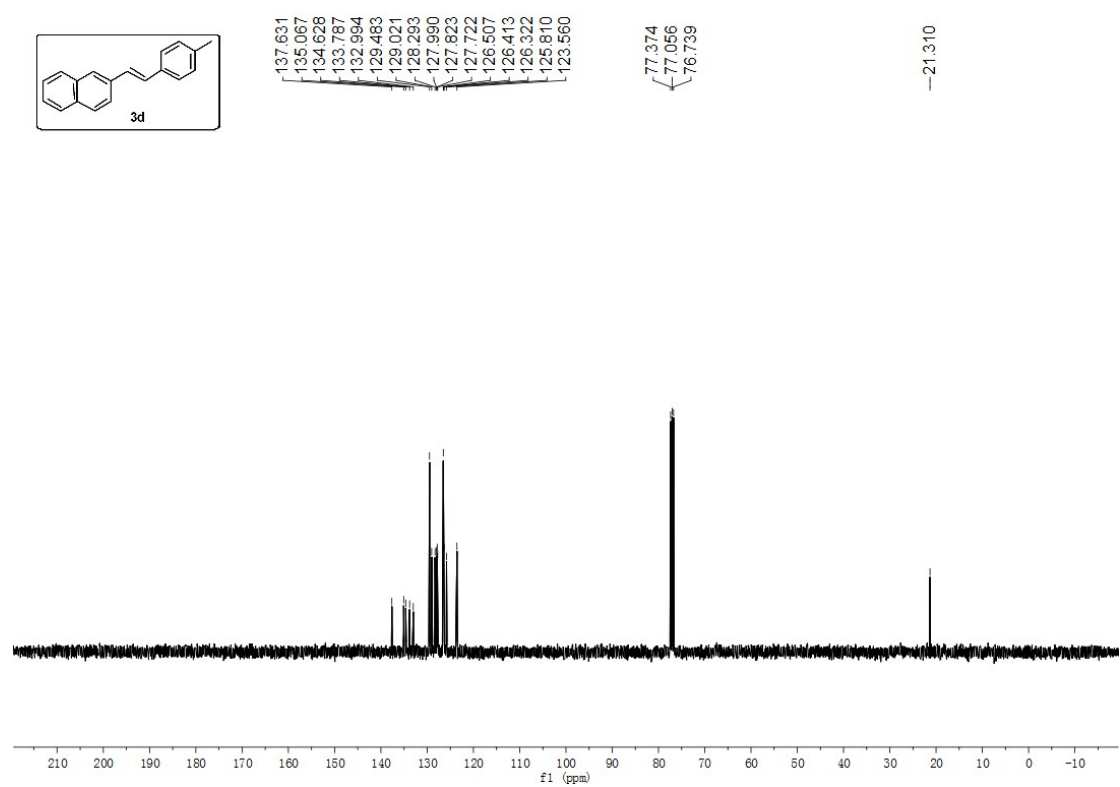

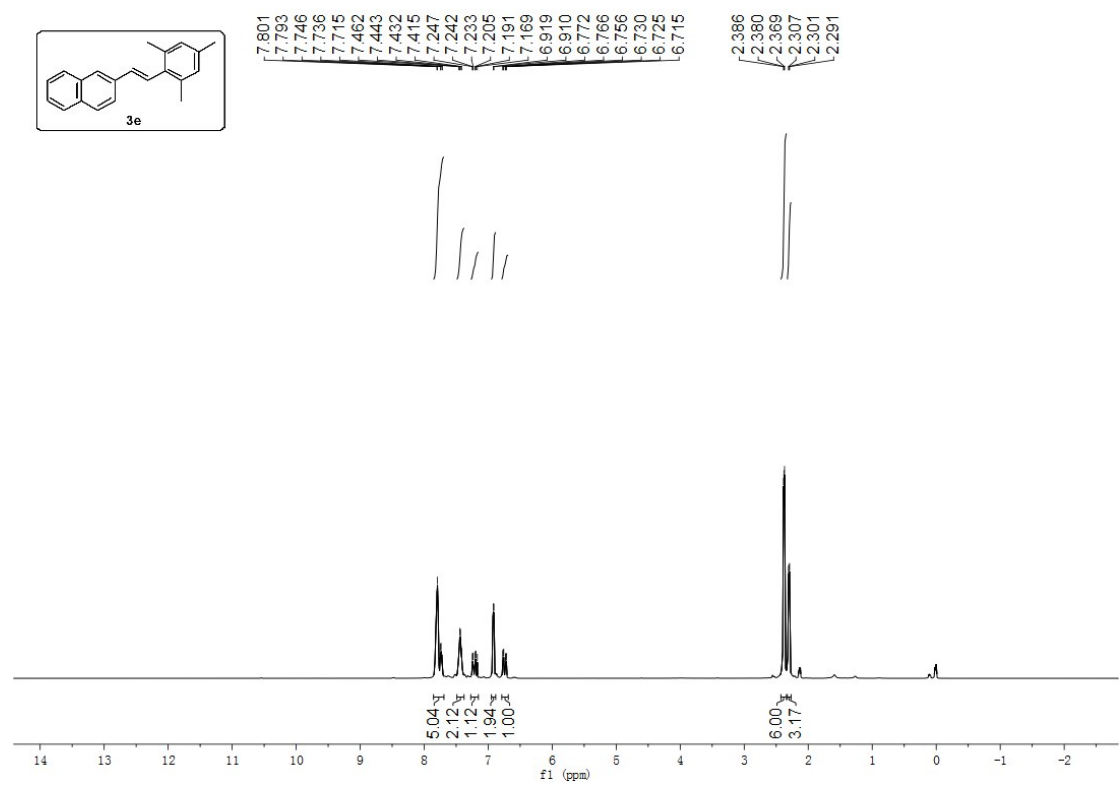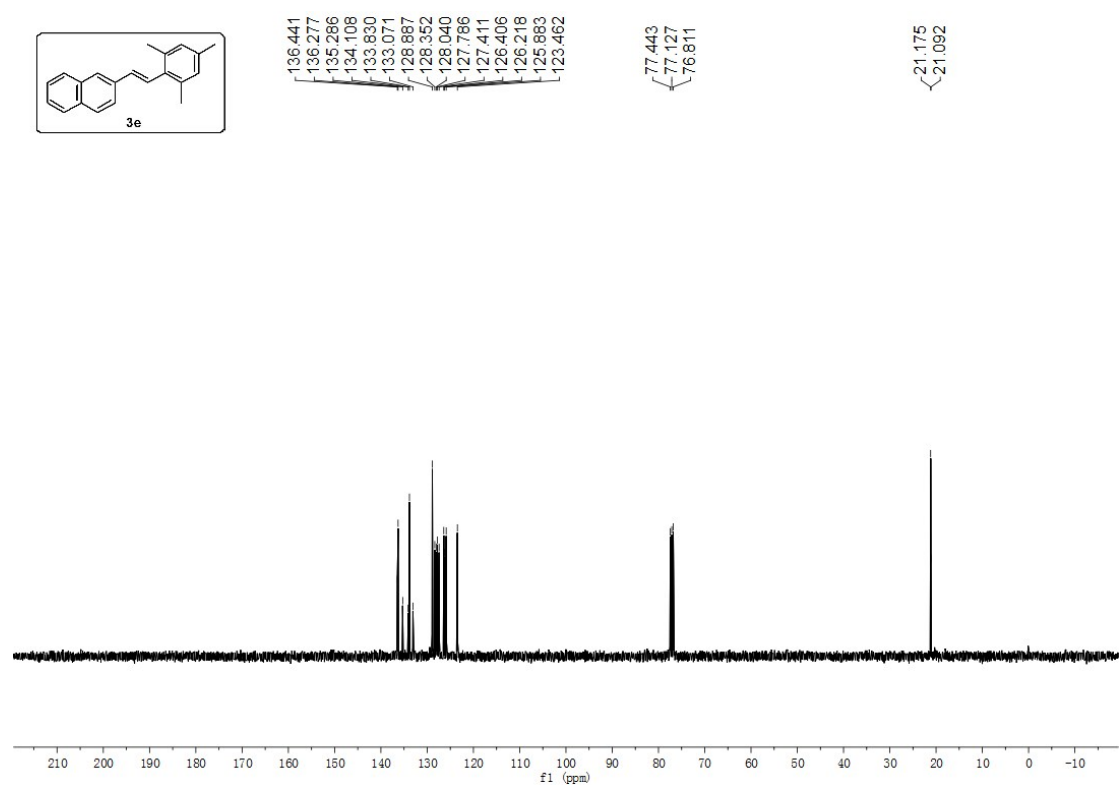

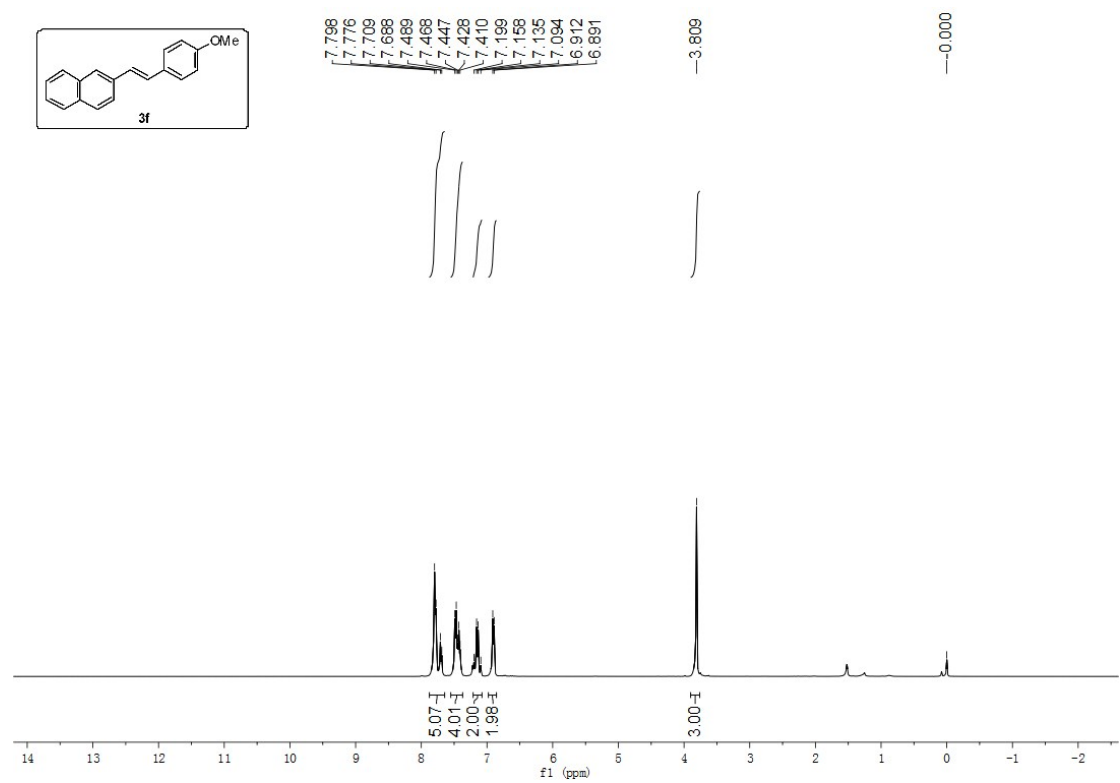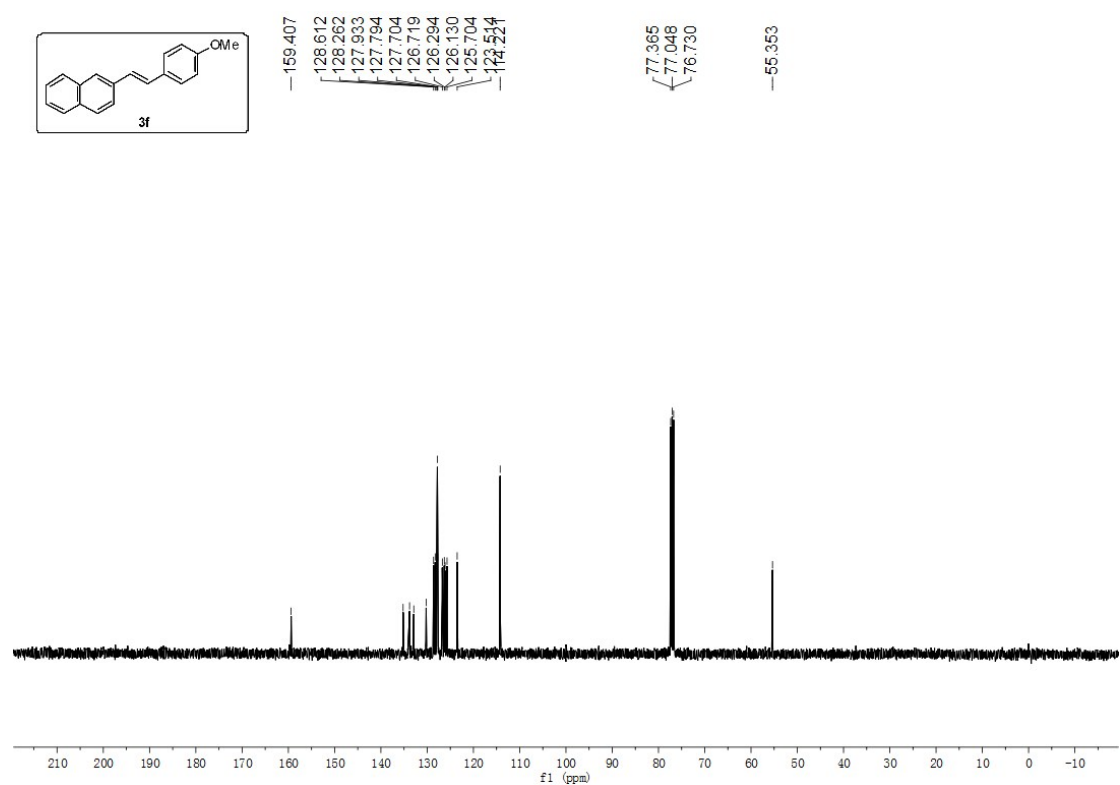

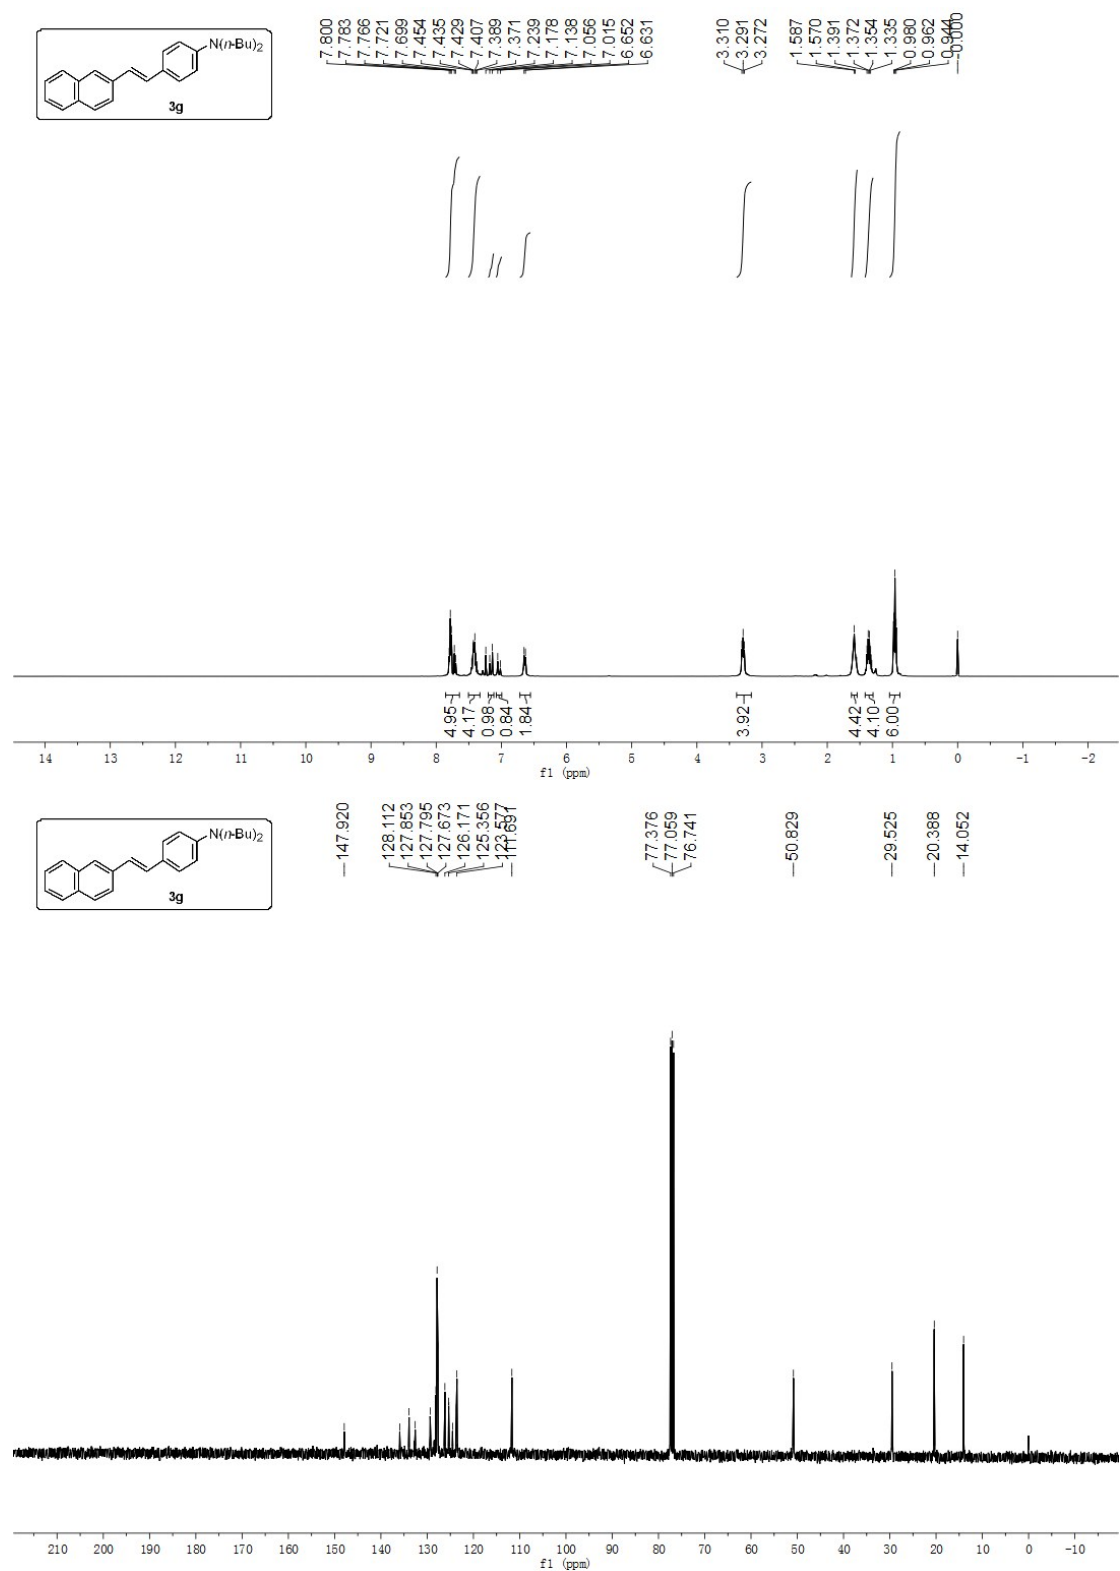

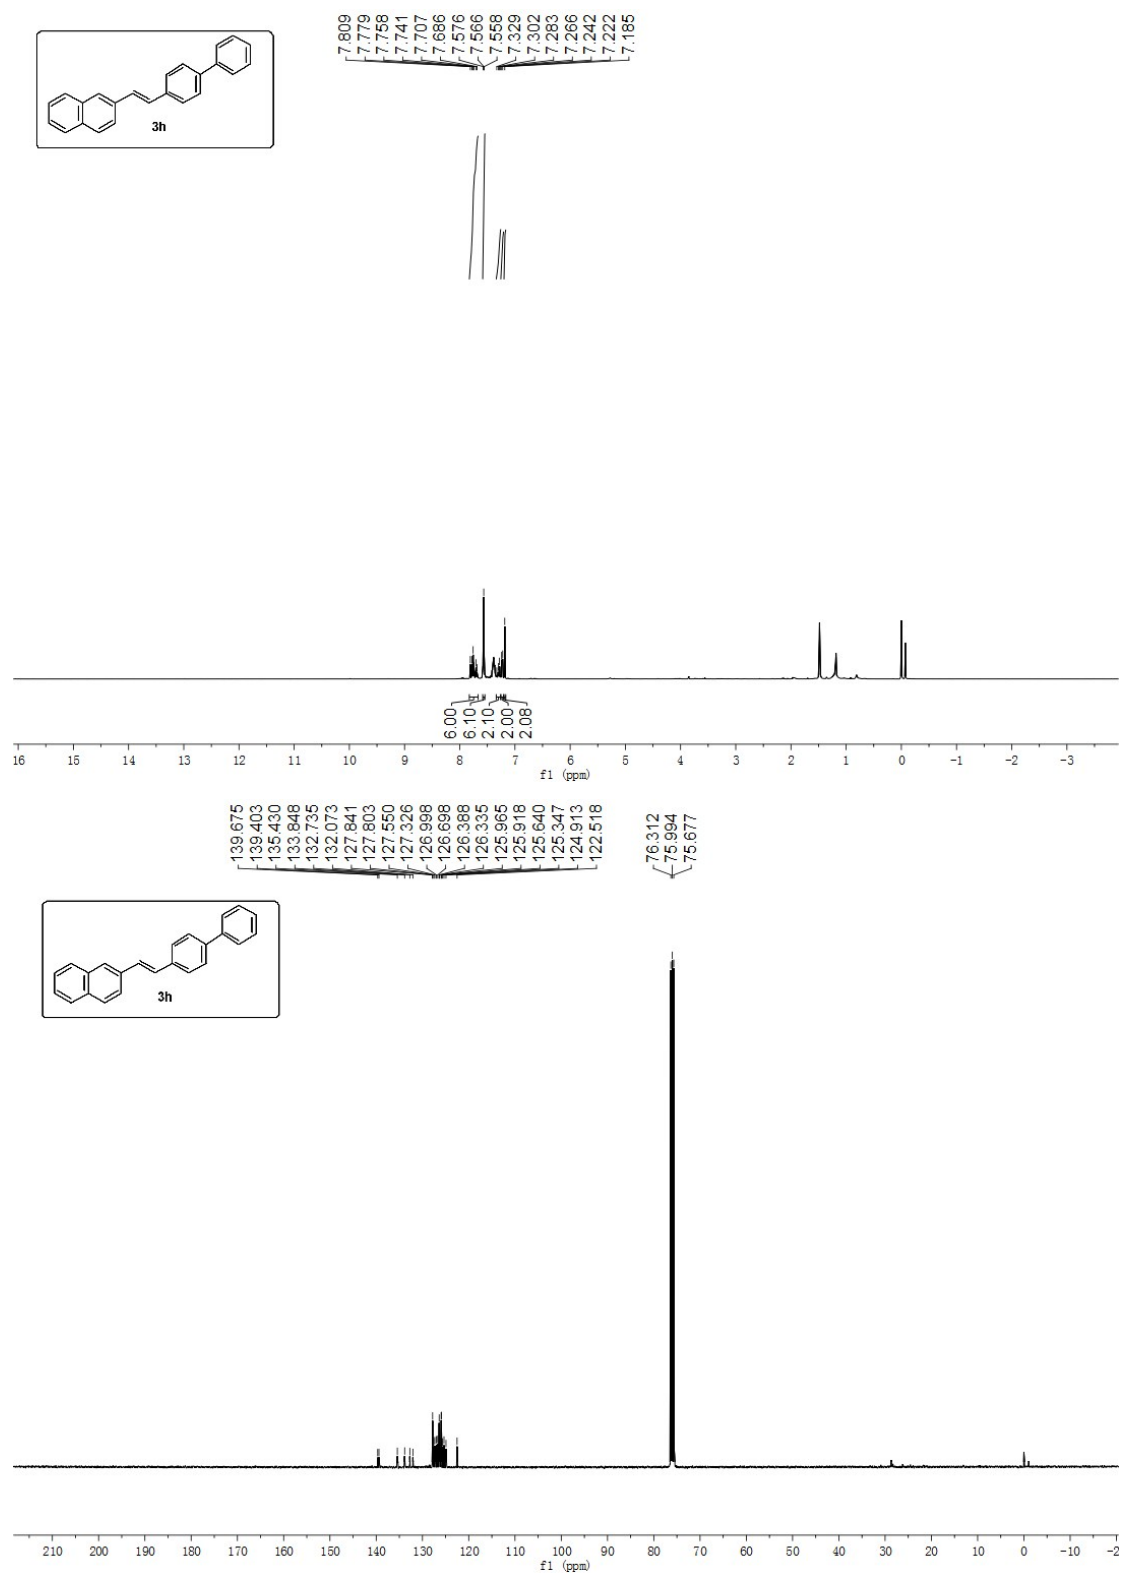

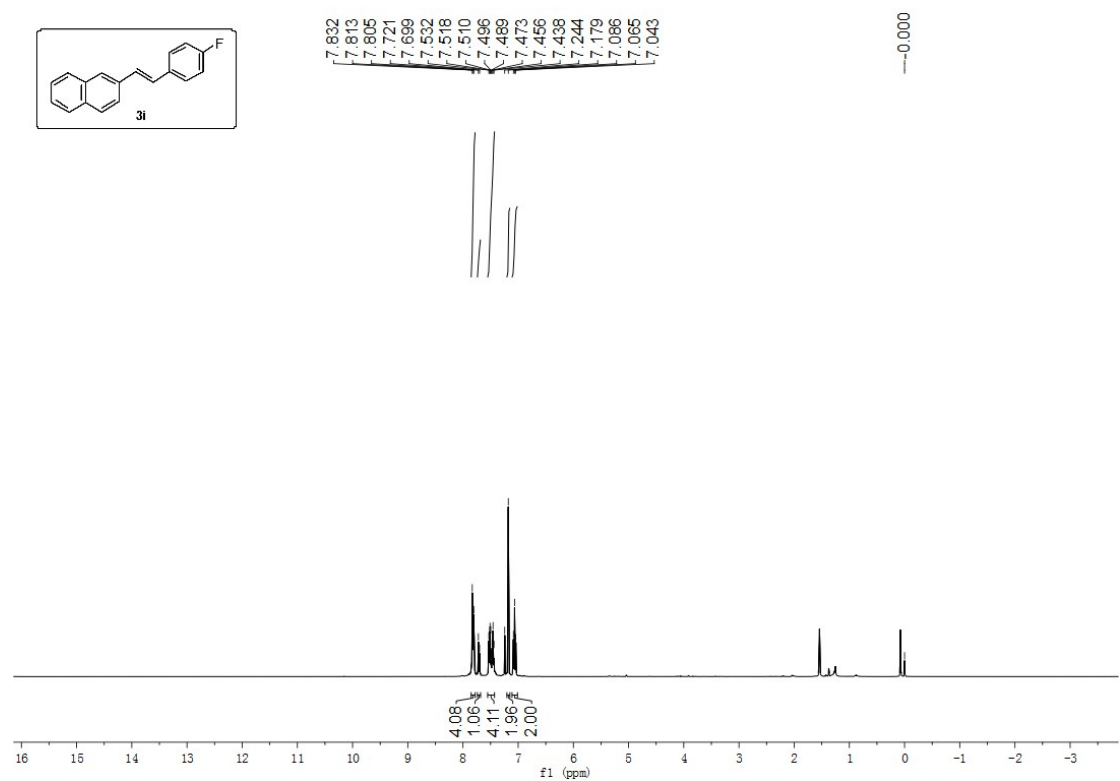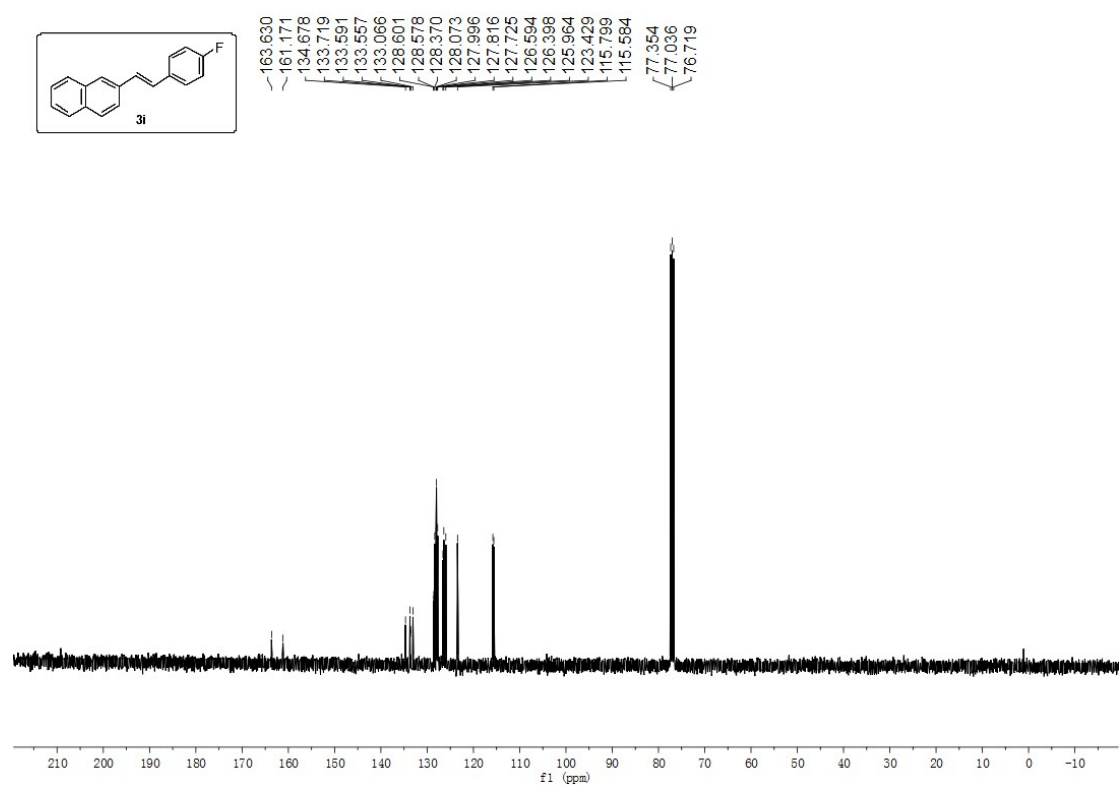

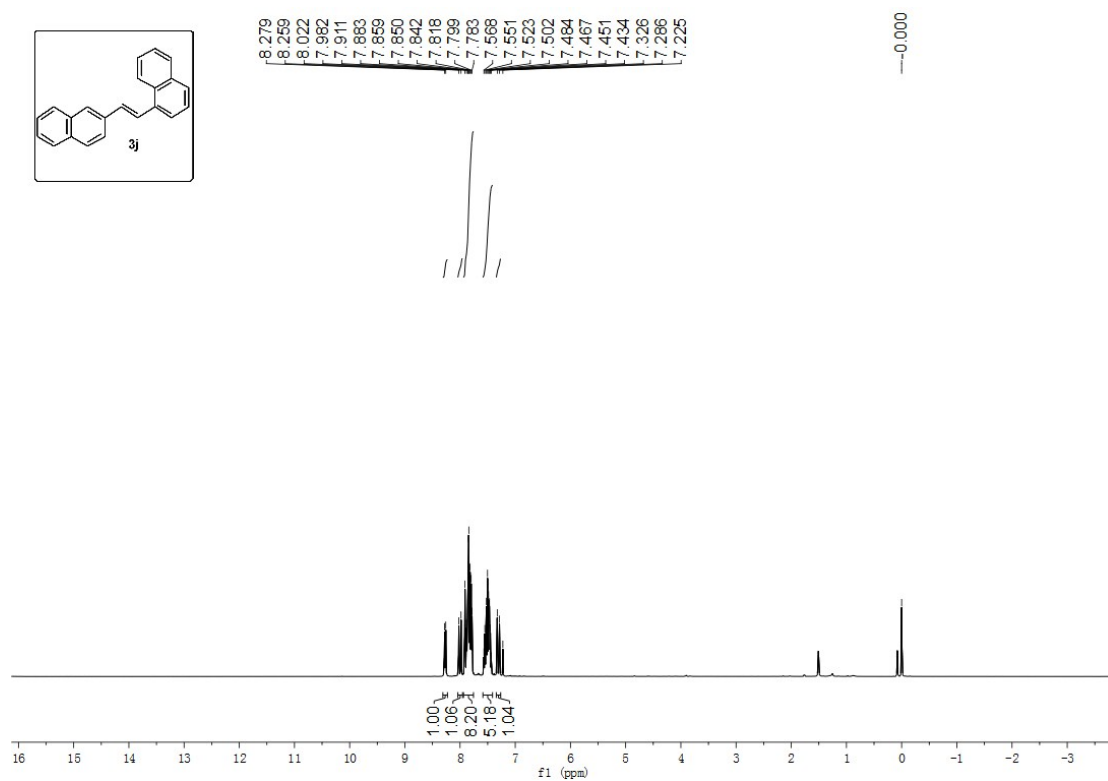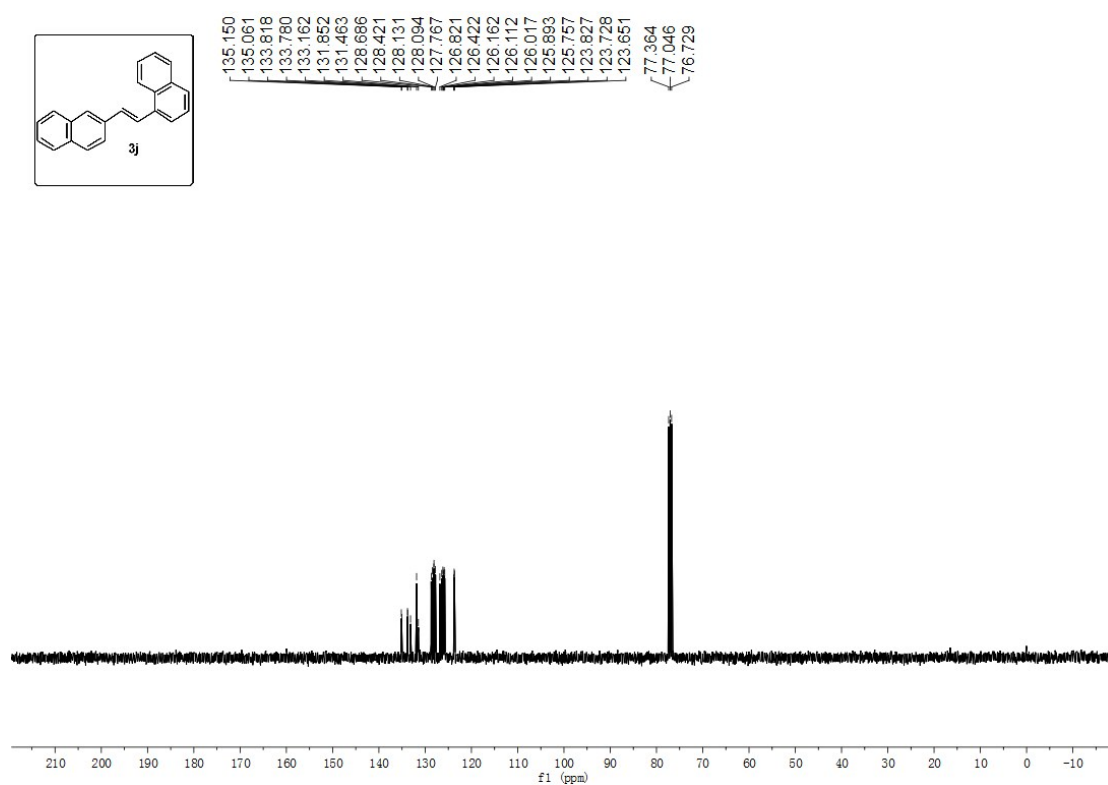

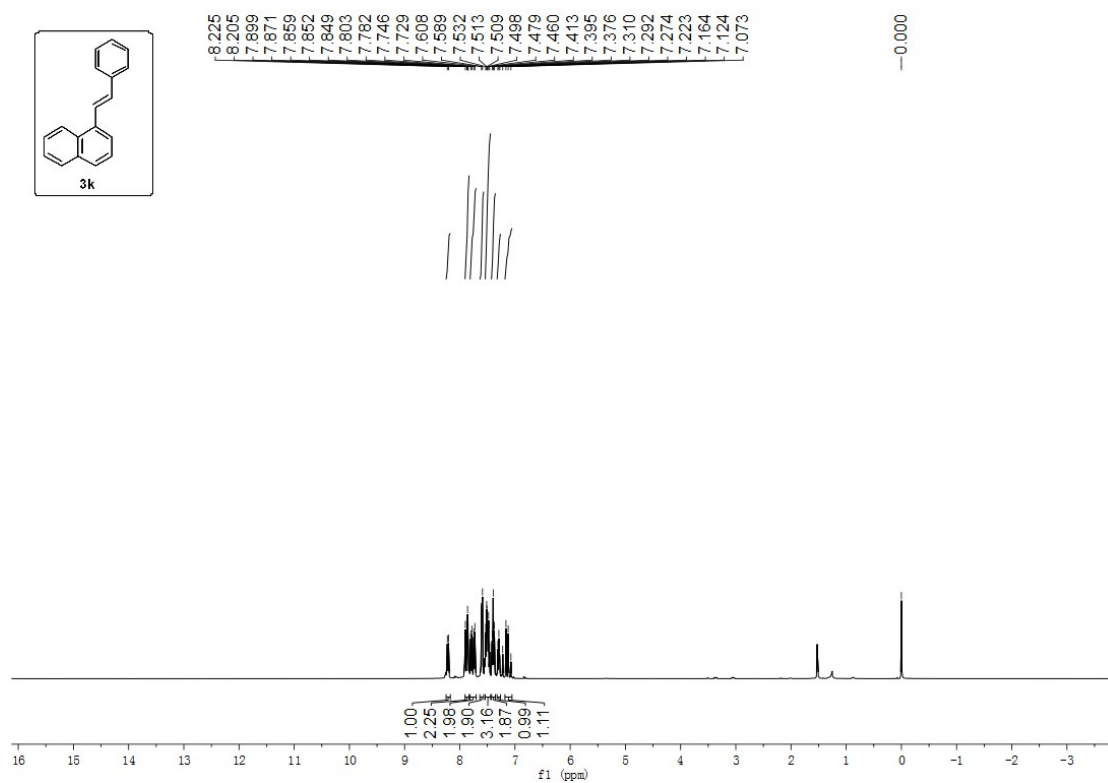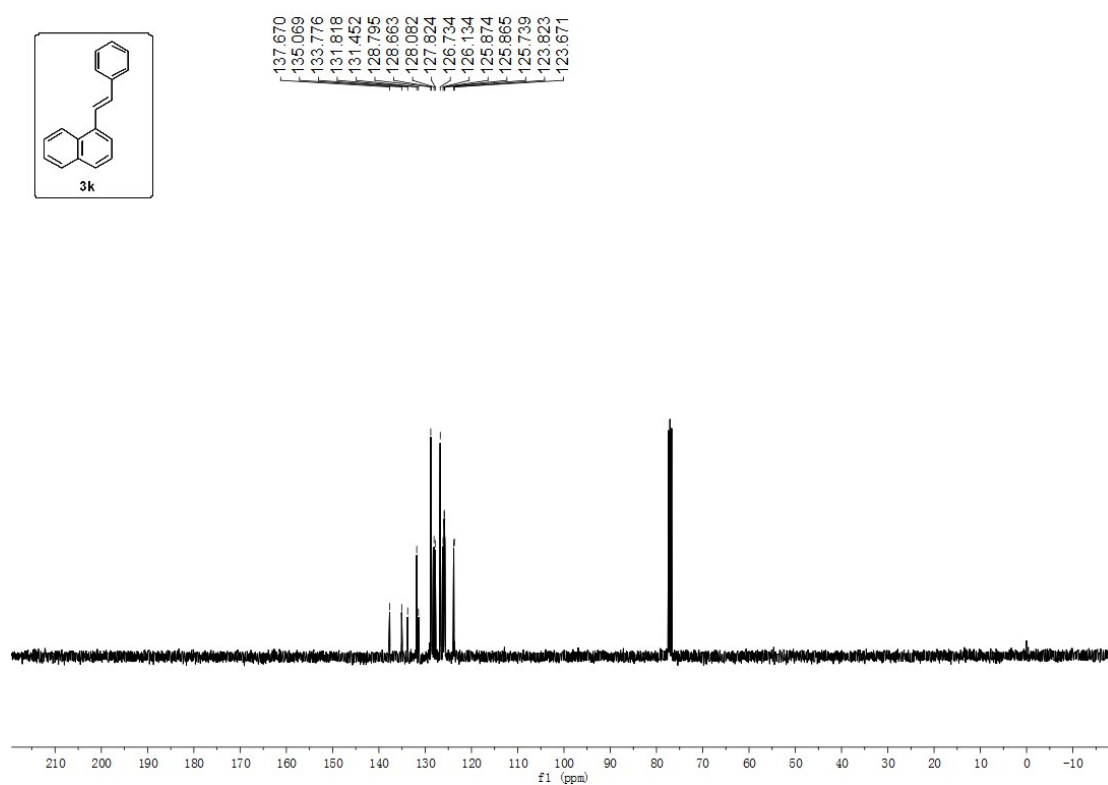

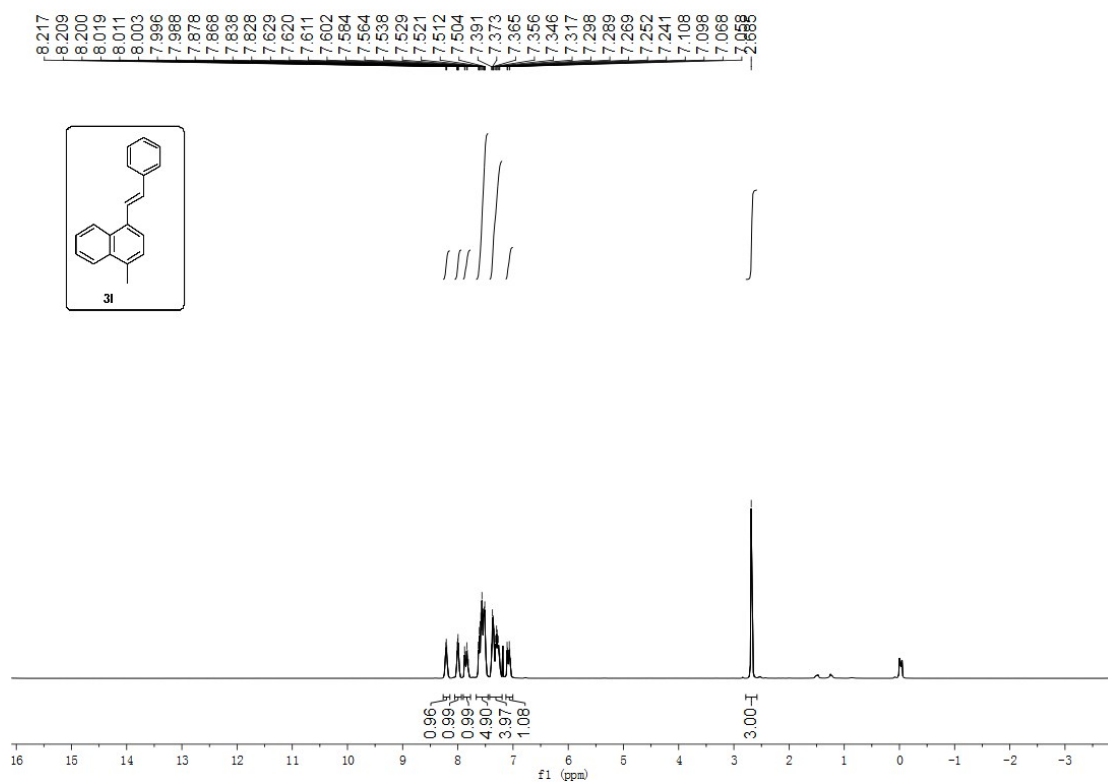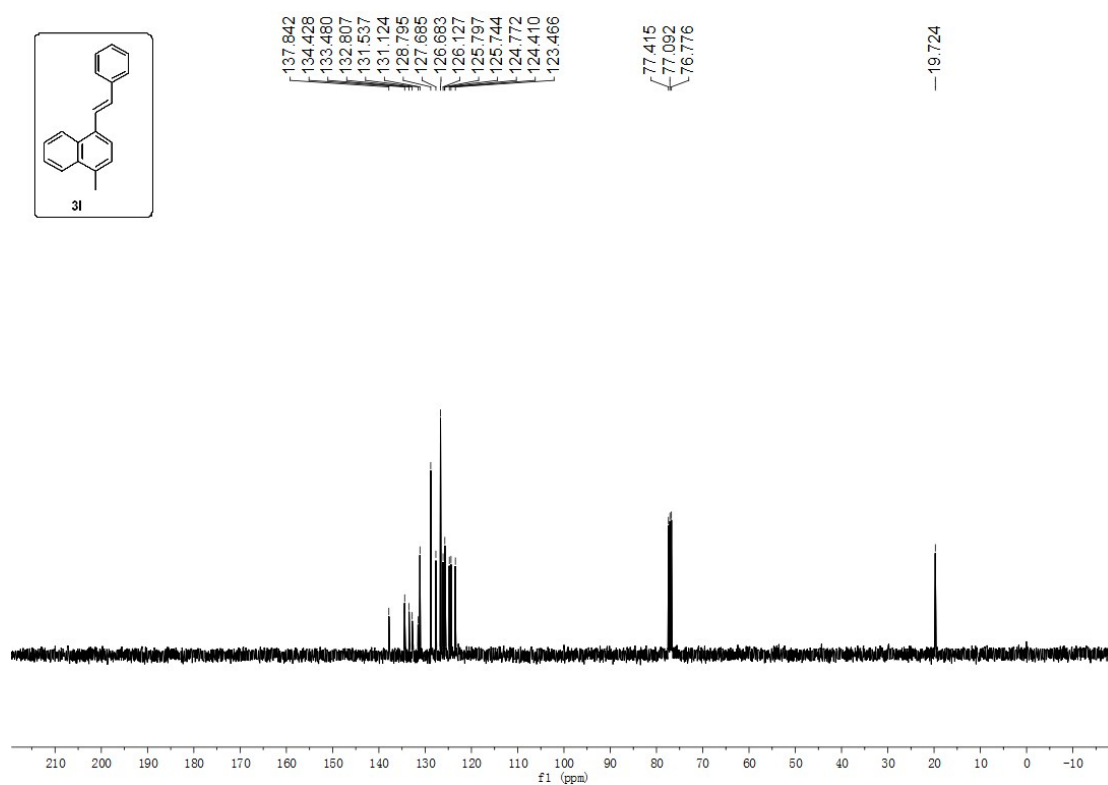

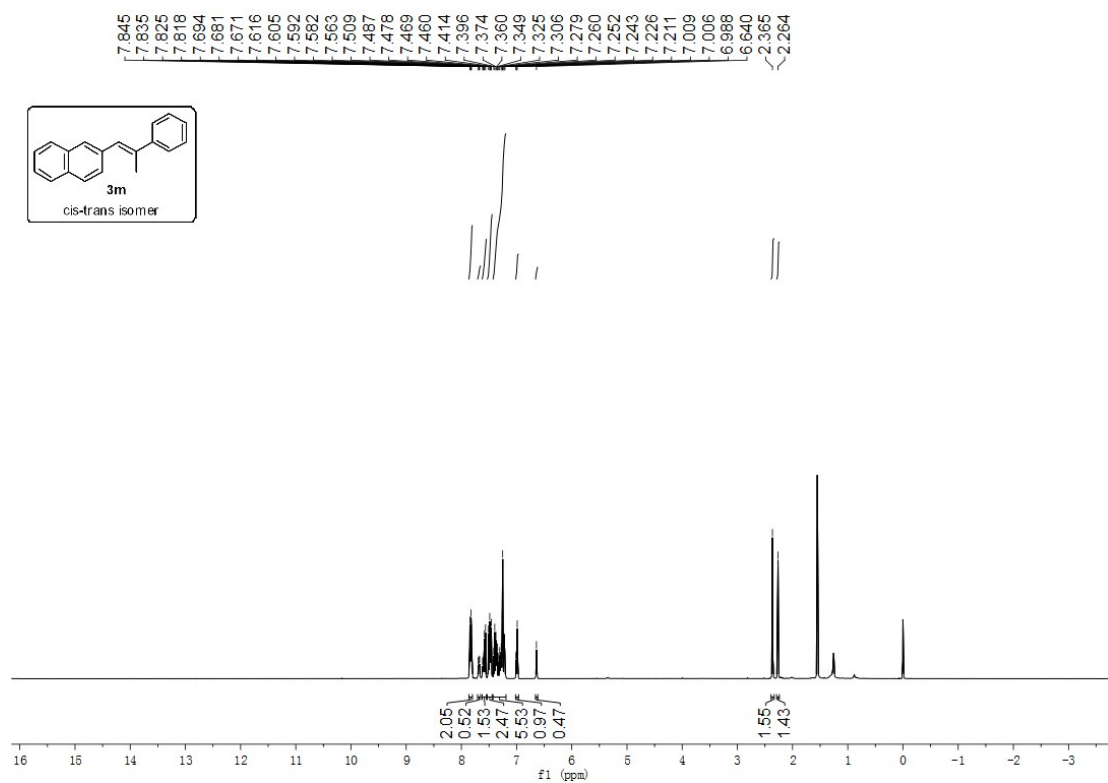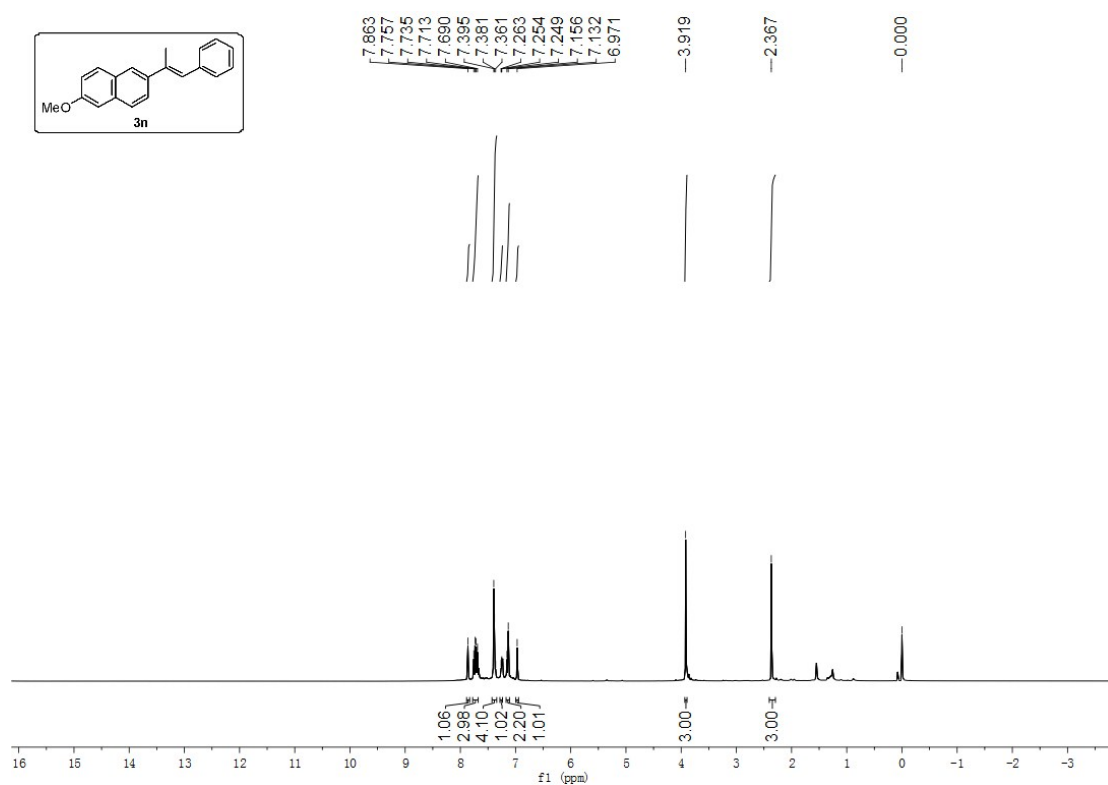

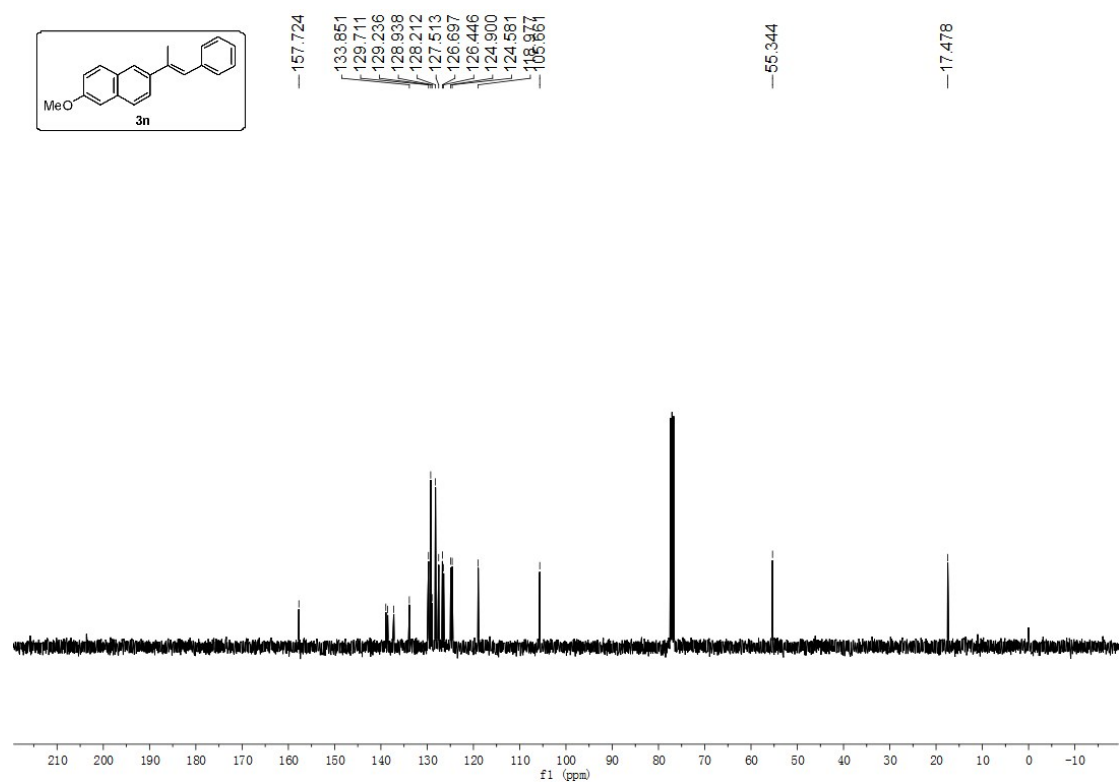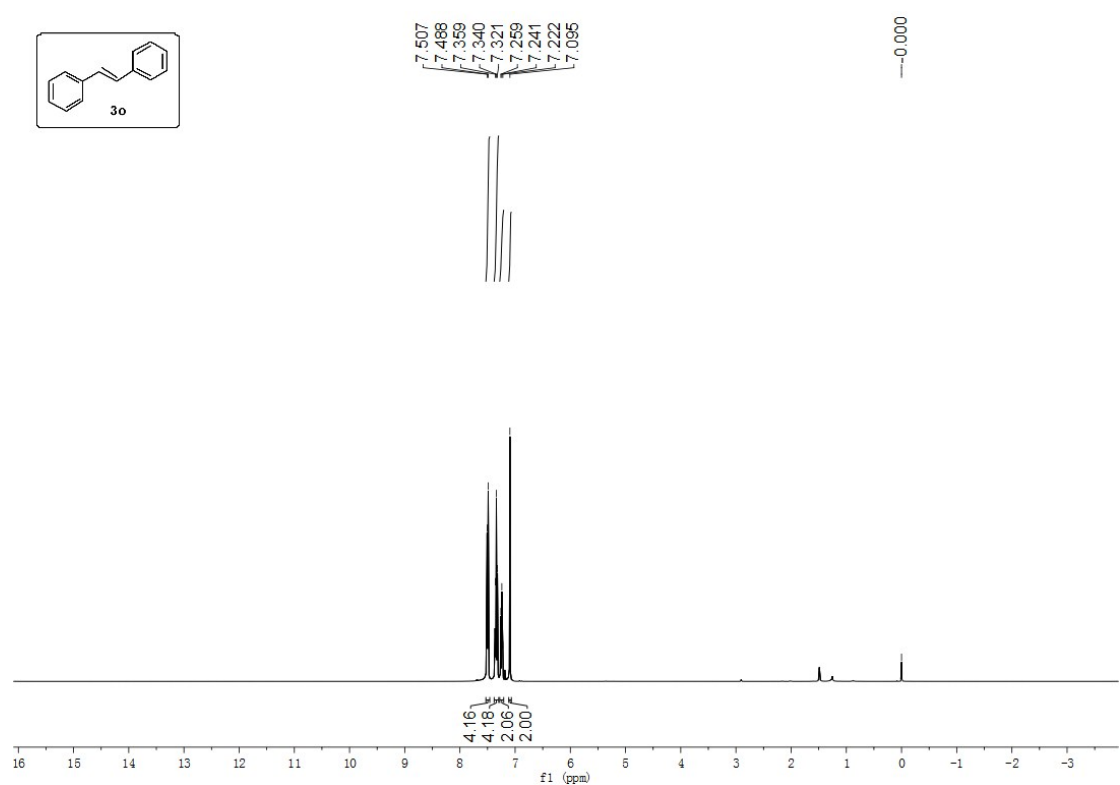

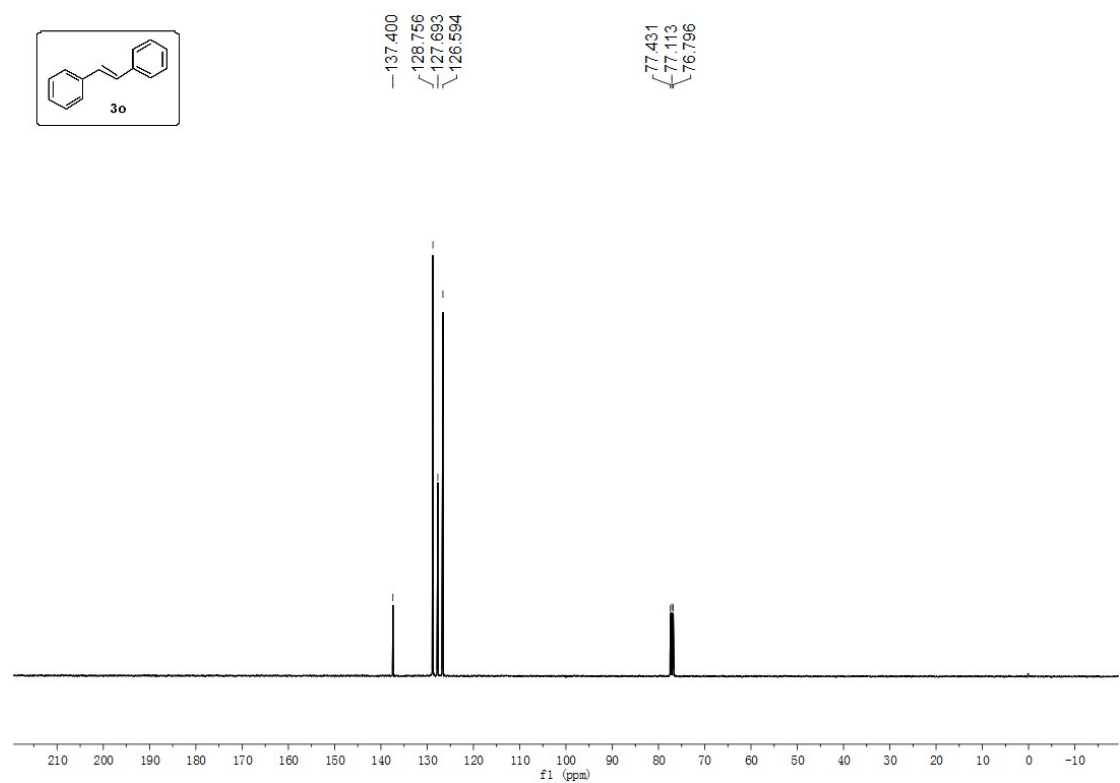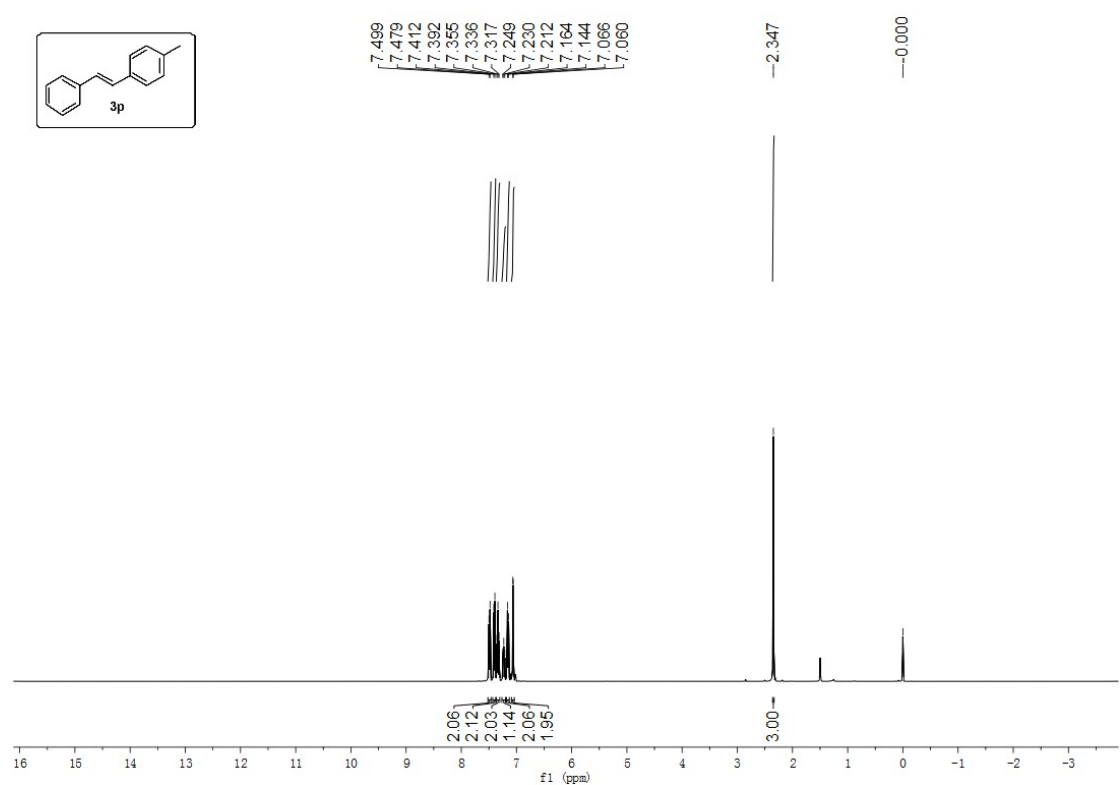

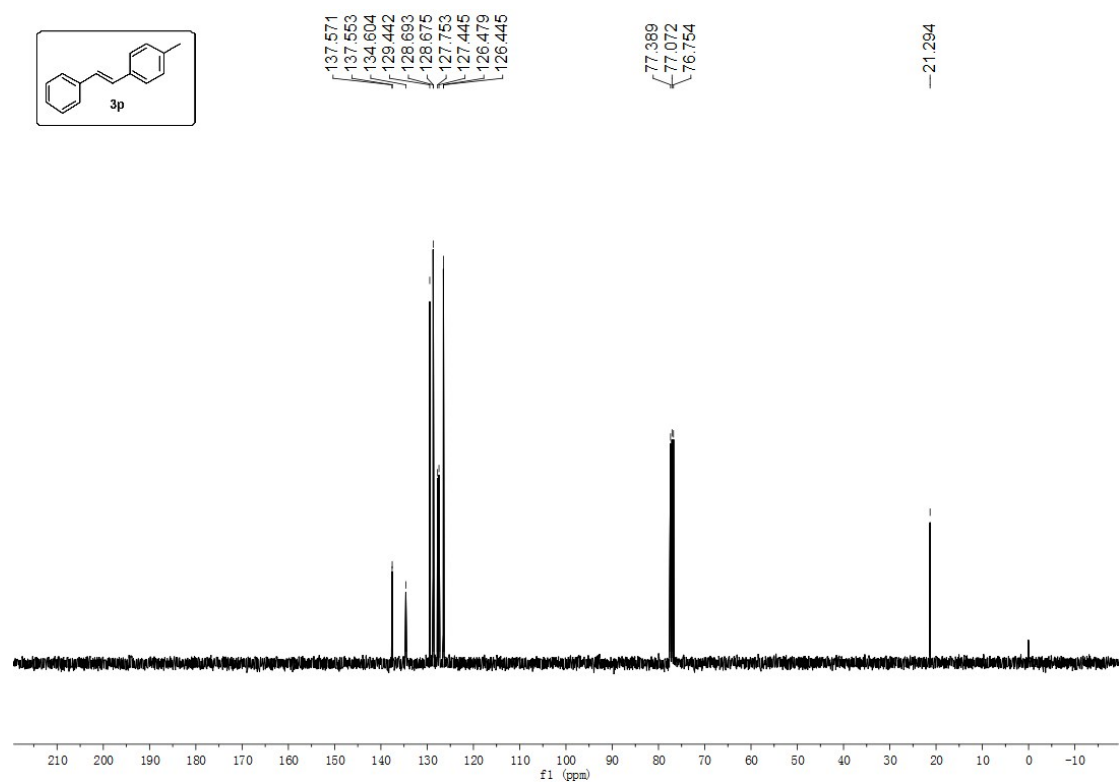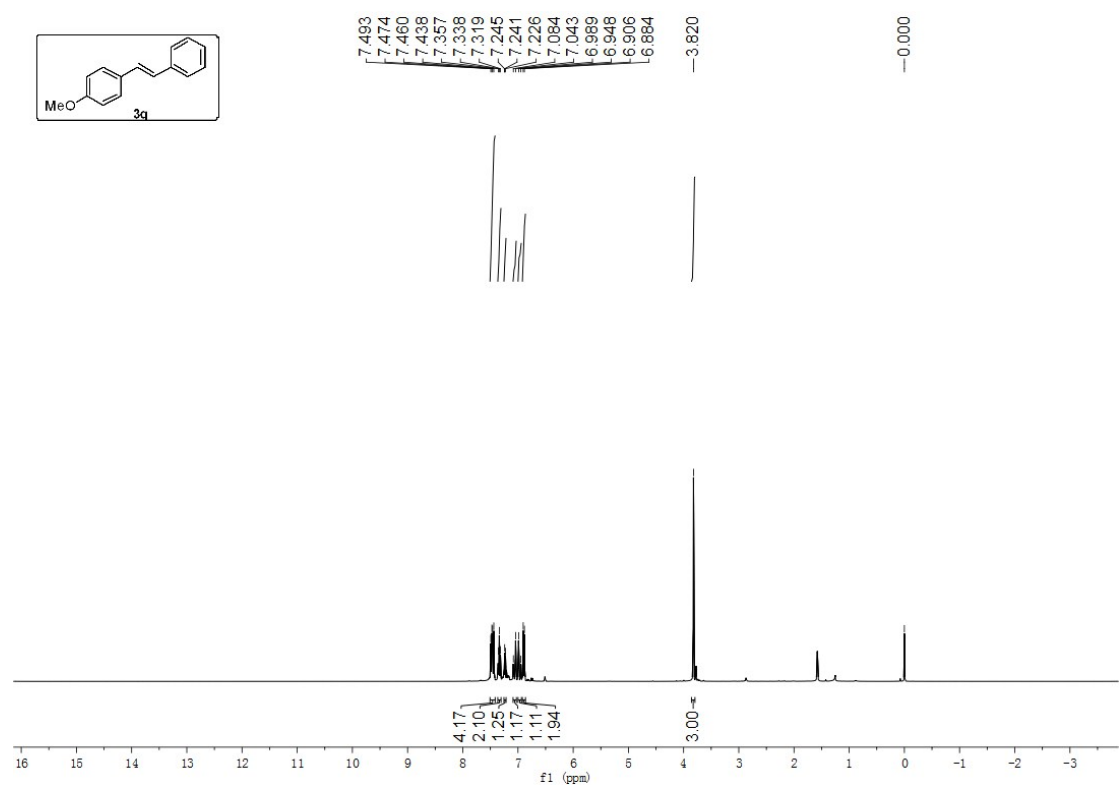

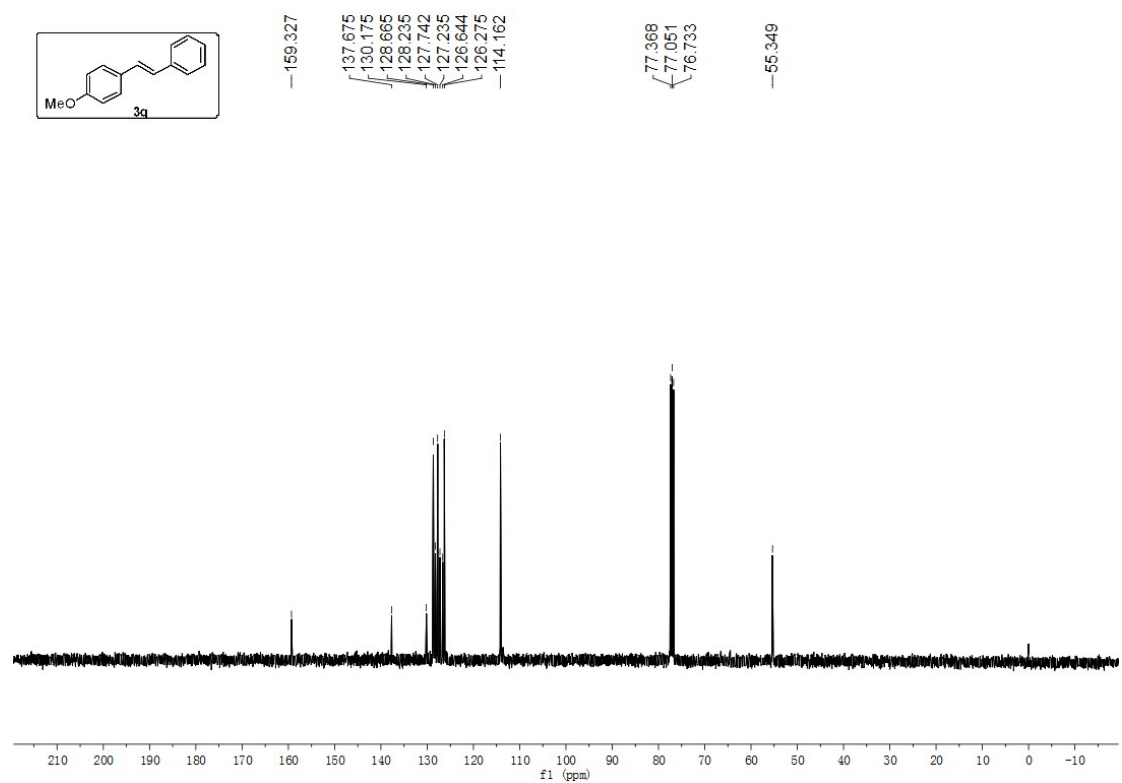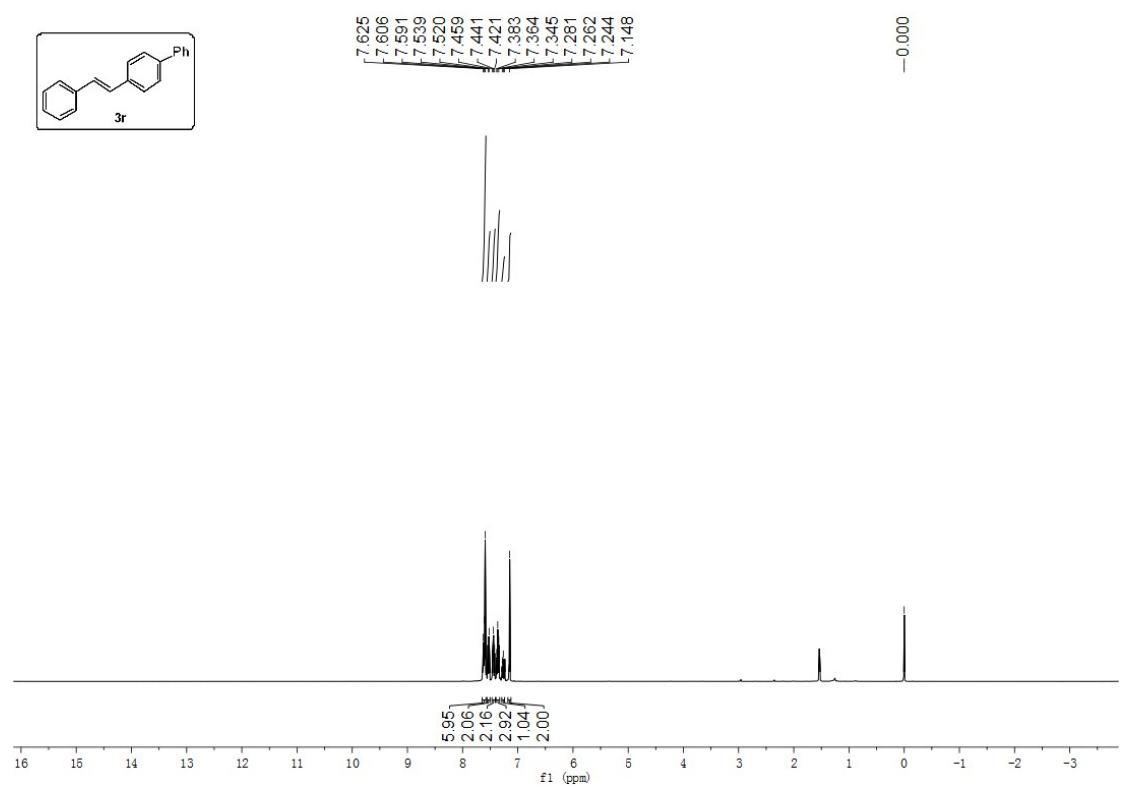

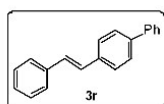

140.701  
140.367  
137.364  
136.416  
128.833  
128.782  
128.735  
128.229  
127.684  
127.381  
127.356  
126.969  
126.948  
126.562

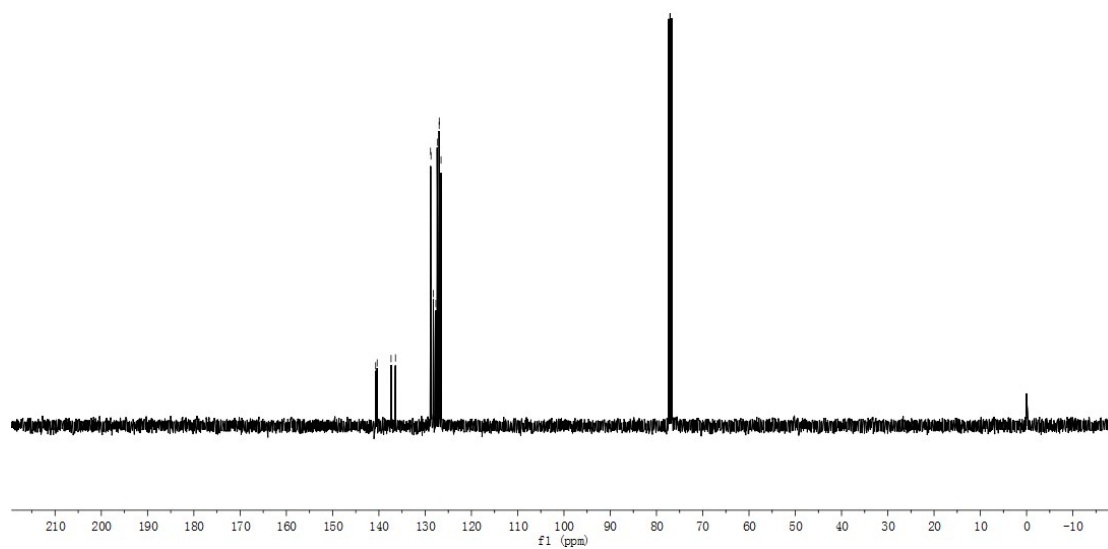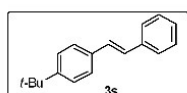

7.516  
7.496  
7.467  
7.446  
7.392  
7.371  
7.347  
7.328  
7.258  
7.237  
7.222  
7.128  
7.111  
7.086

1.333

0.000

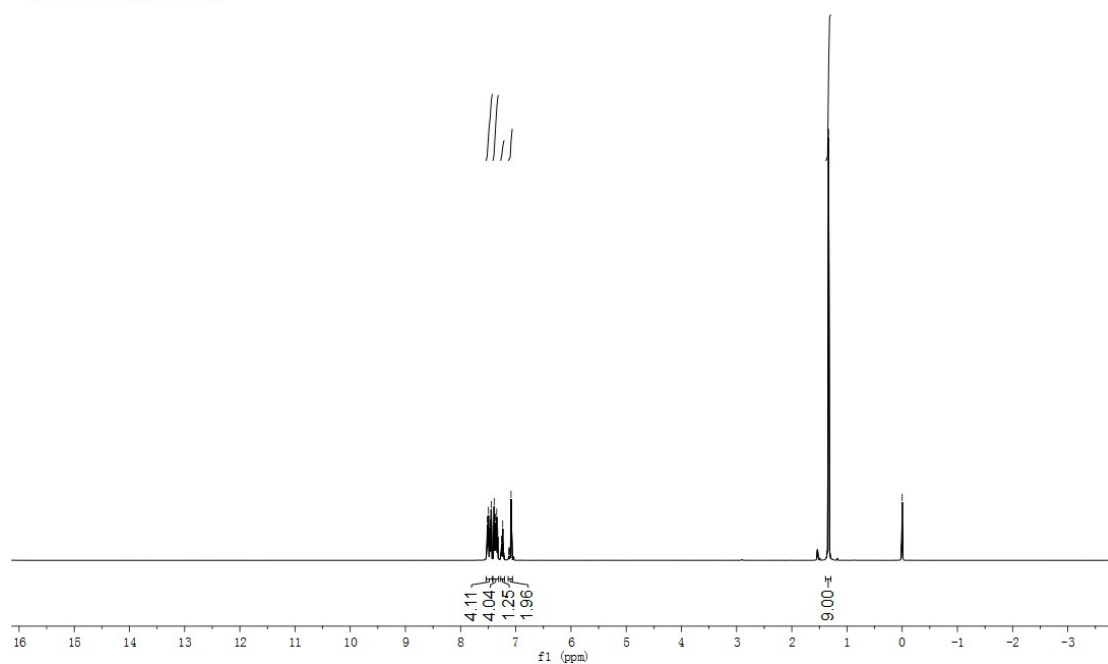

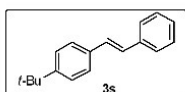

150.816  
137.577  
134.596  
128.674  
128.532  
127.963  
127.440  
126.448  
126.279  
125.644

77.363  
77.046  
76.728

34.655  
31.326

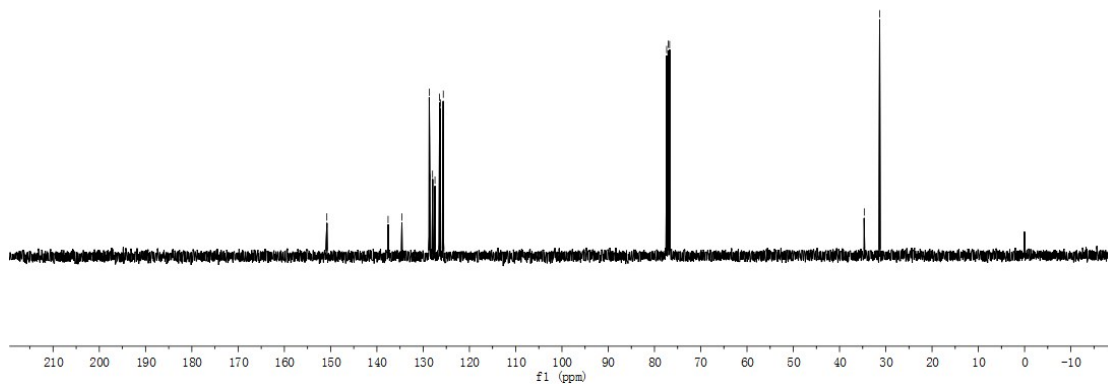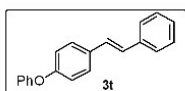

7.491  
7.471  
7.359  
7.342  
7.324  
7.308  
7.288  
7.266  
7.254  
7.235  
7.227  
7.174  
7.171  
7.128  
7.110  
7.093  
7.055  
7.029  
6.915  
6.895

0.000

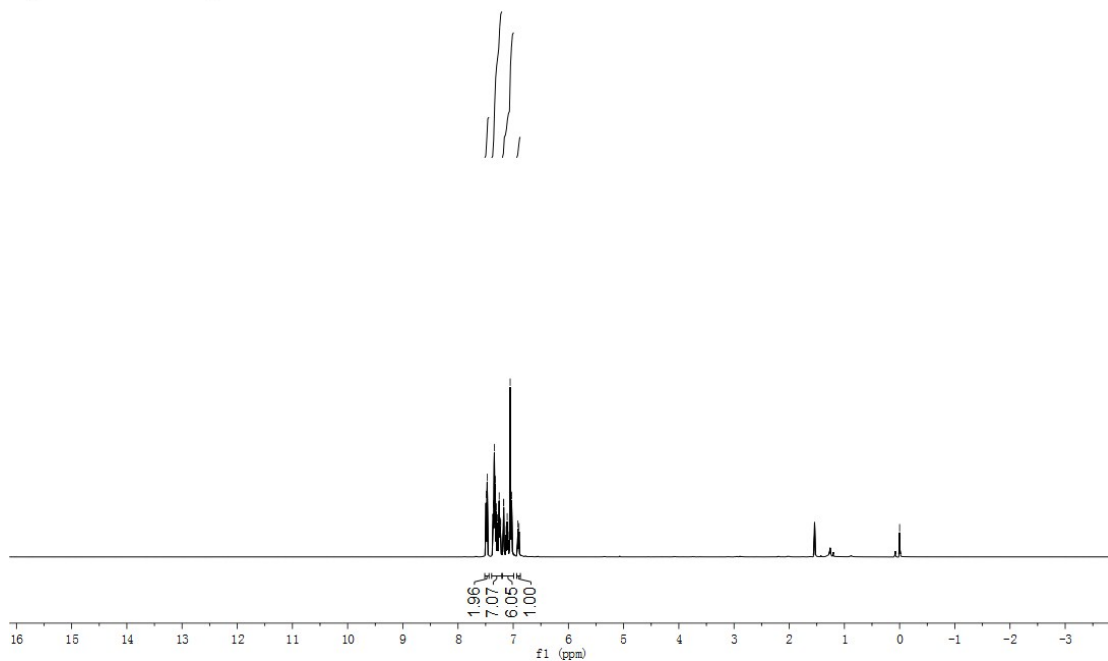

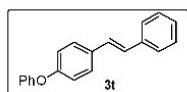

157.617  
157.263  
139.319  
137.081  
129.976  
129.829  
129.502  
128.737  
128.067  
127.854  
126.627  
123.313  
121.692  
118.912  
116.172  
116.750  
77.389  
77.072  
76.754

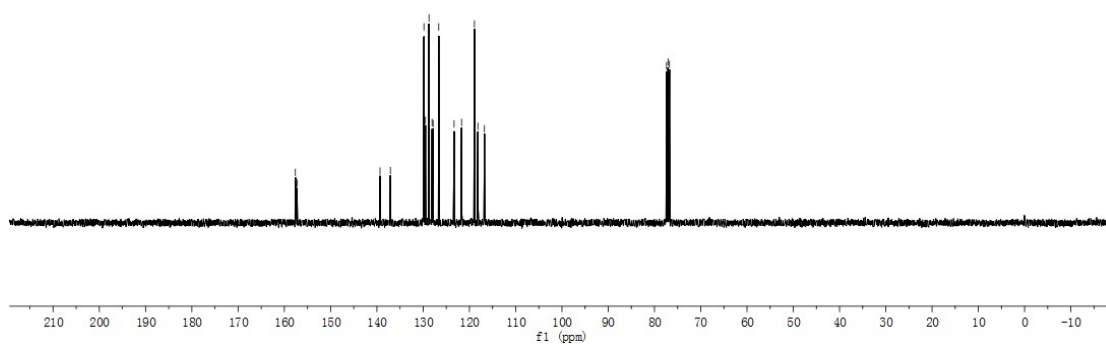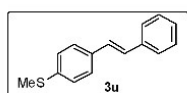

7.506  
7.487  
7.443  
7.422  
7.368  
7.349  
7.330  
7.266  
7.248  
7.227  
7.060

2.497

0.000

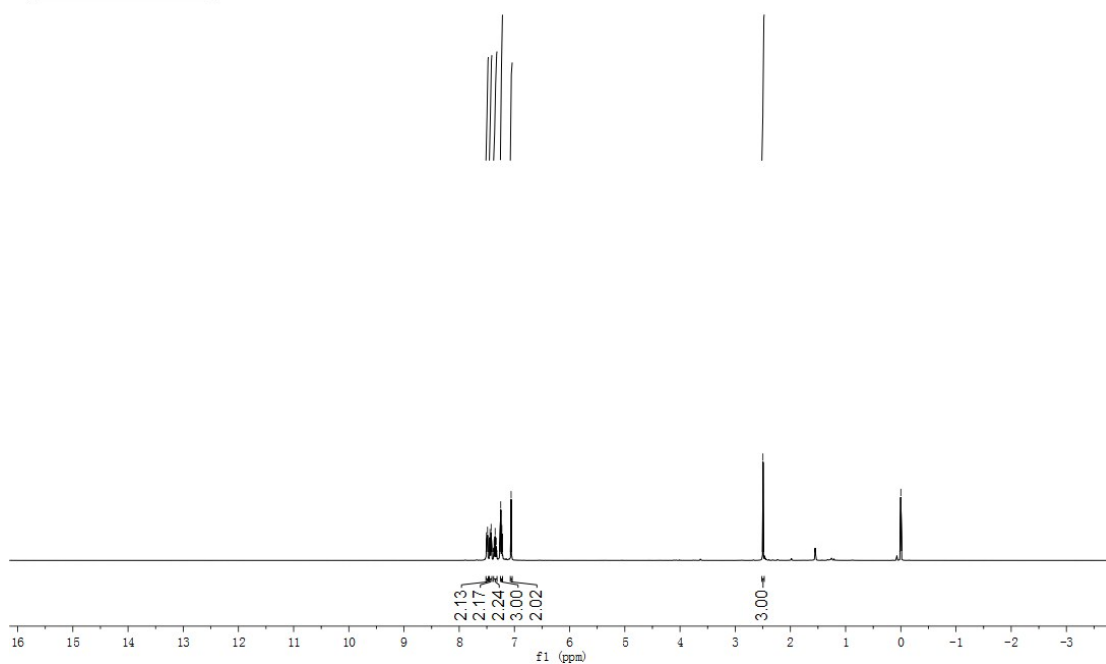

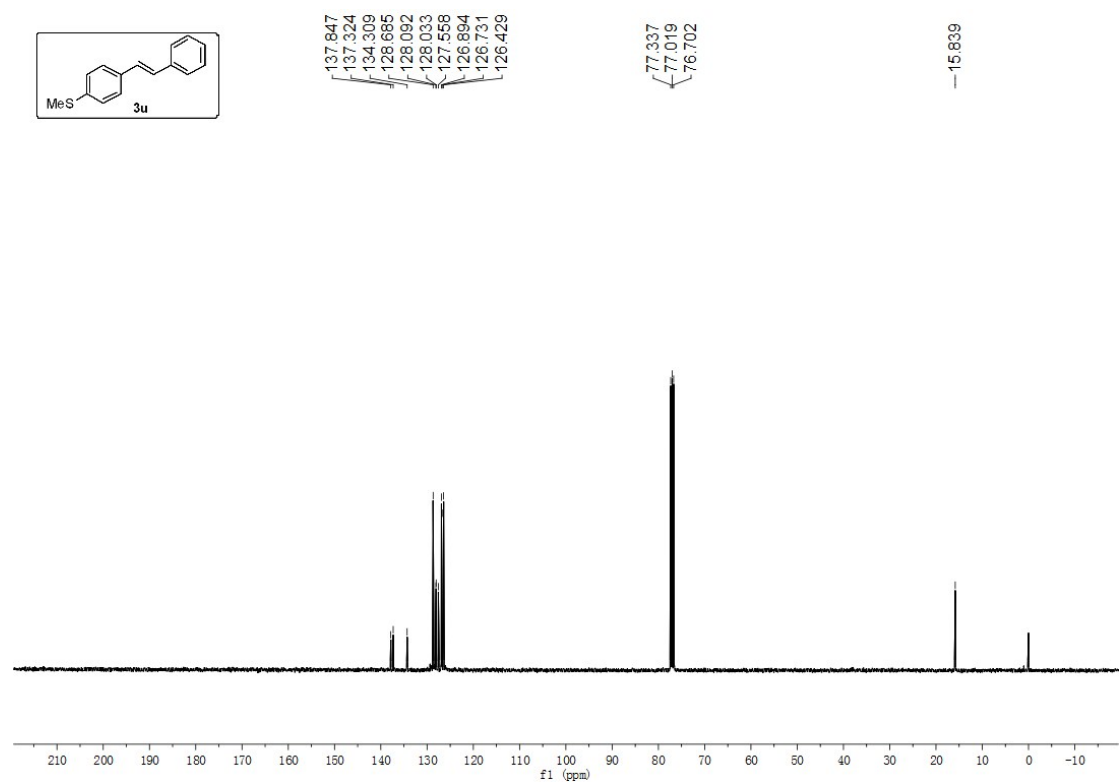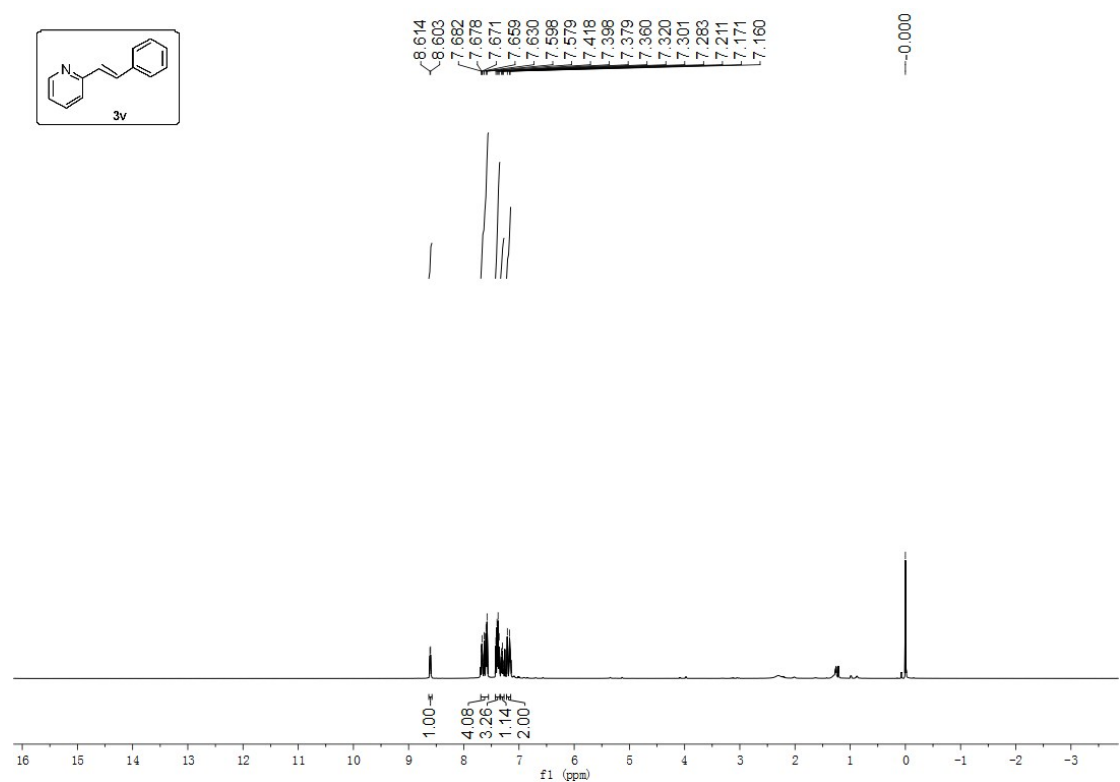

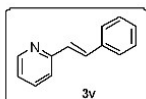

155.494  
 149.377  
 136.829  
 136.572  
 133.097  
 128.754  
 128.448  
 127.601  
 127.174  
 122.138  
 122.116

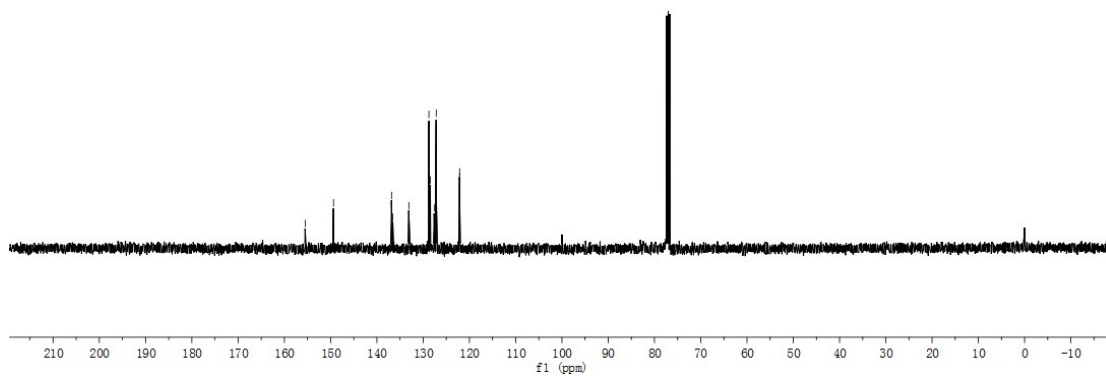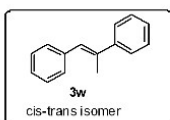

7.533  
 7.514  
 7.387  
 7.370  
 7.362  
 7.350  
 7.301  
 7.282  
 7.275  
 7.255  
 7.240  
 7.225  
 7.188  
 7.171  
 7.104  
 7.088  
 7.069  
 7.046  
 6.946  
 6.928  
 6.837  
 6.489

2.282  
 2.202

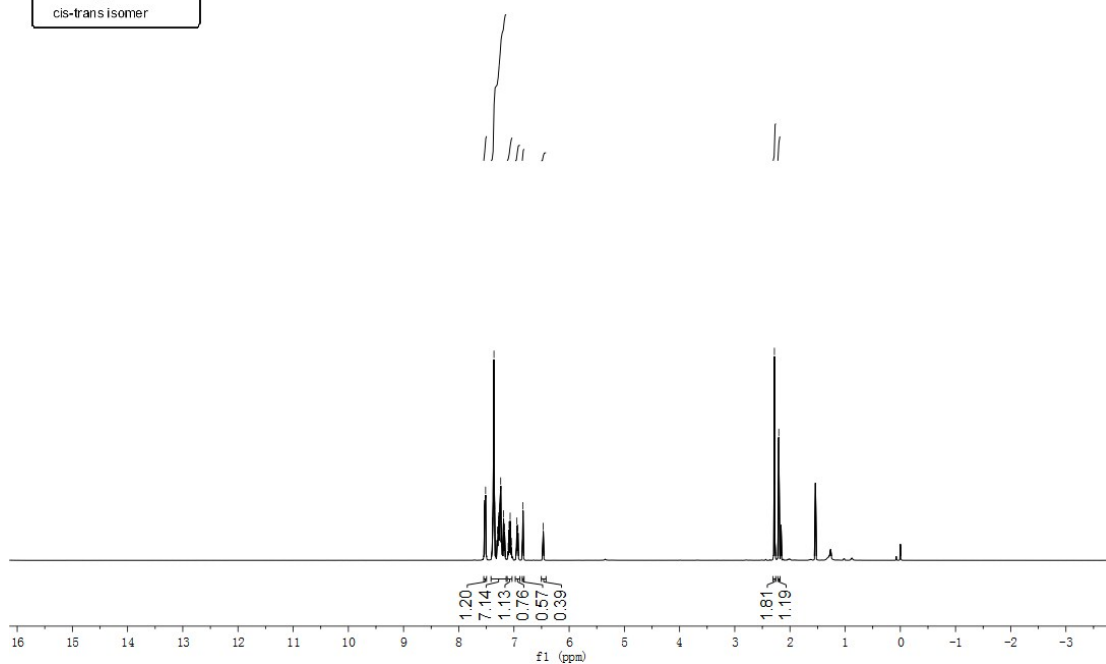

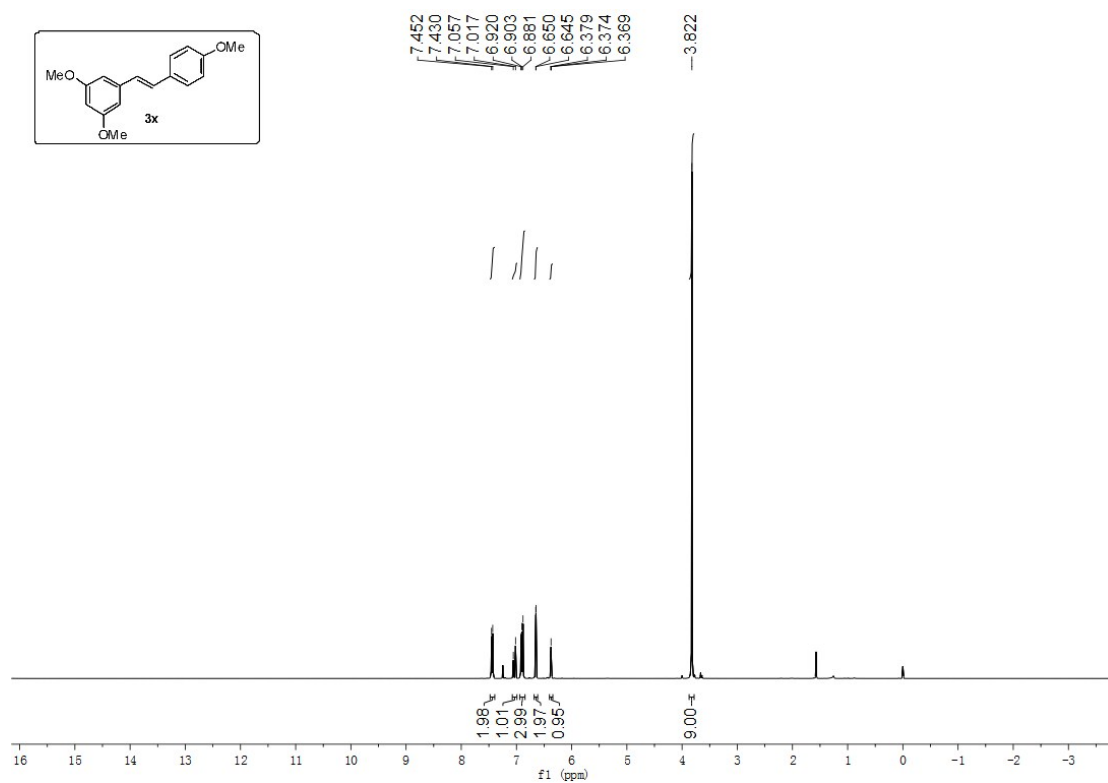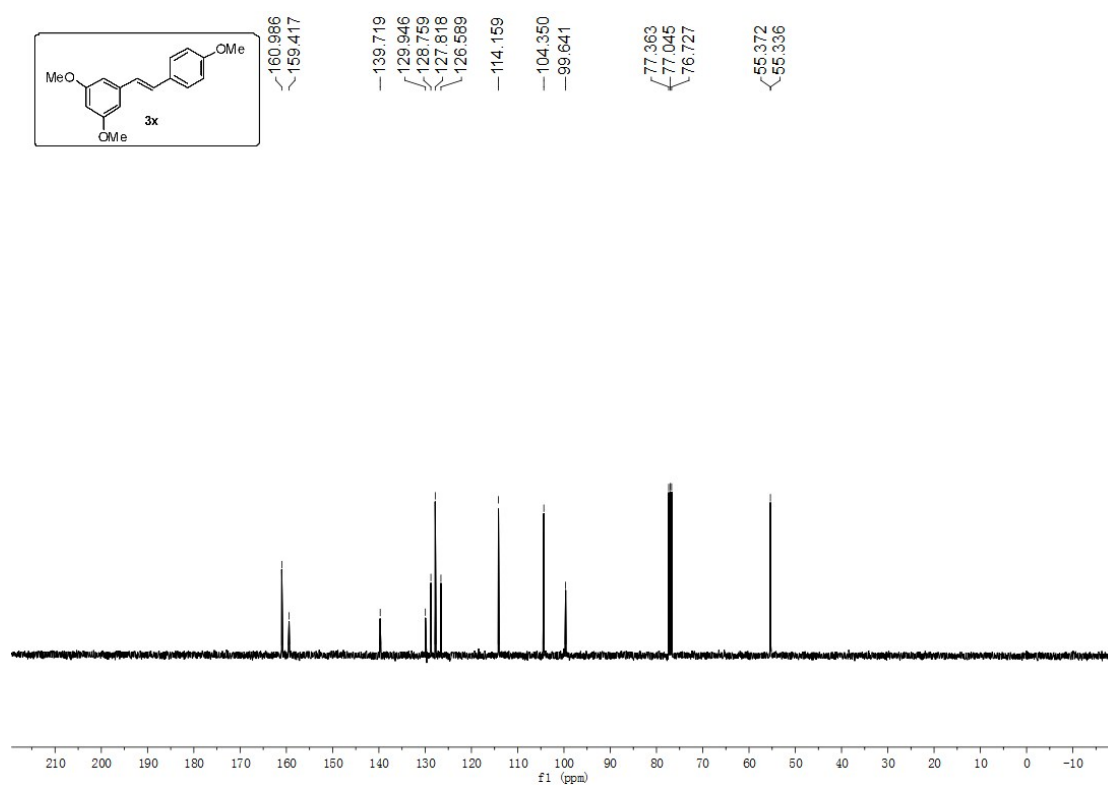

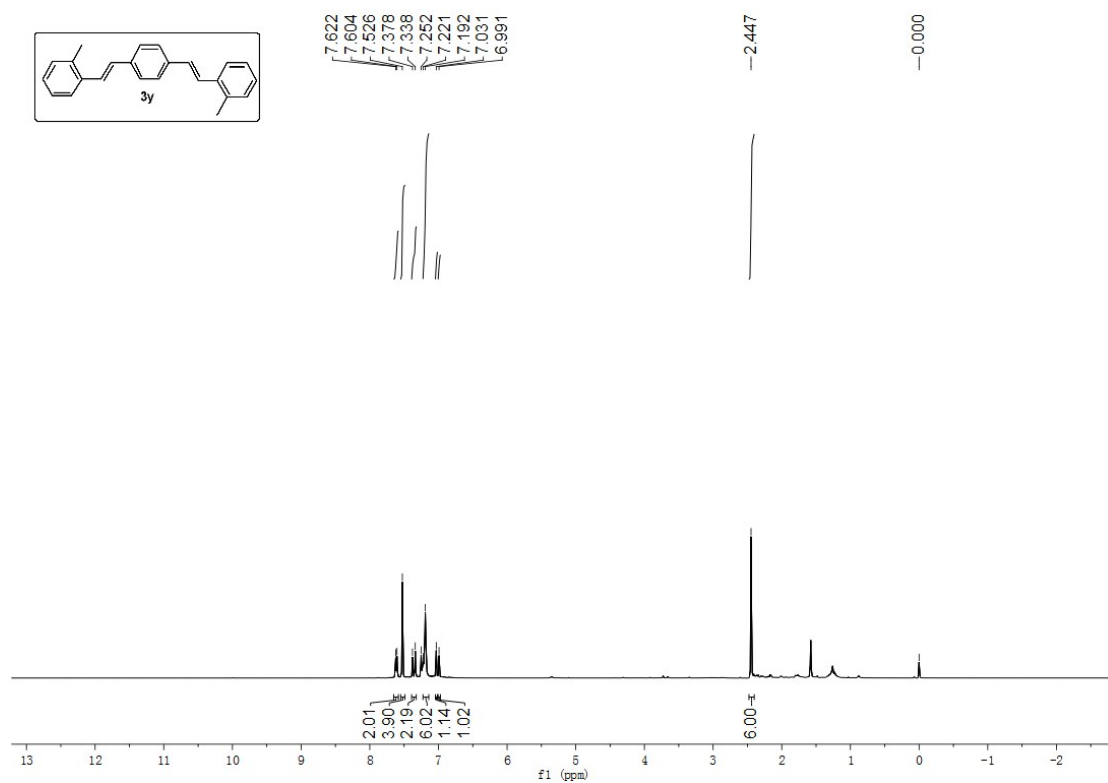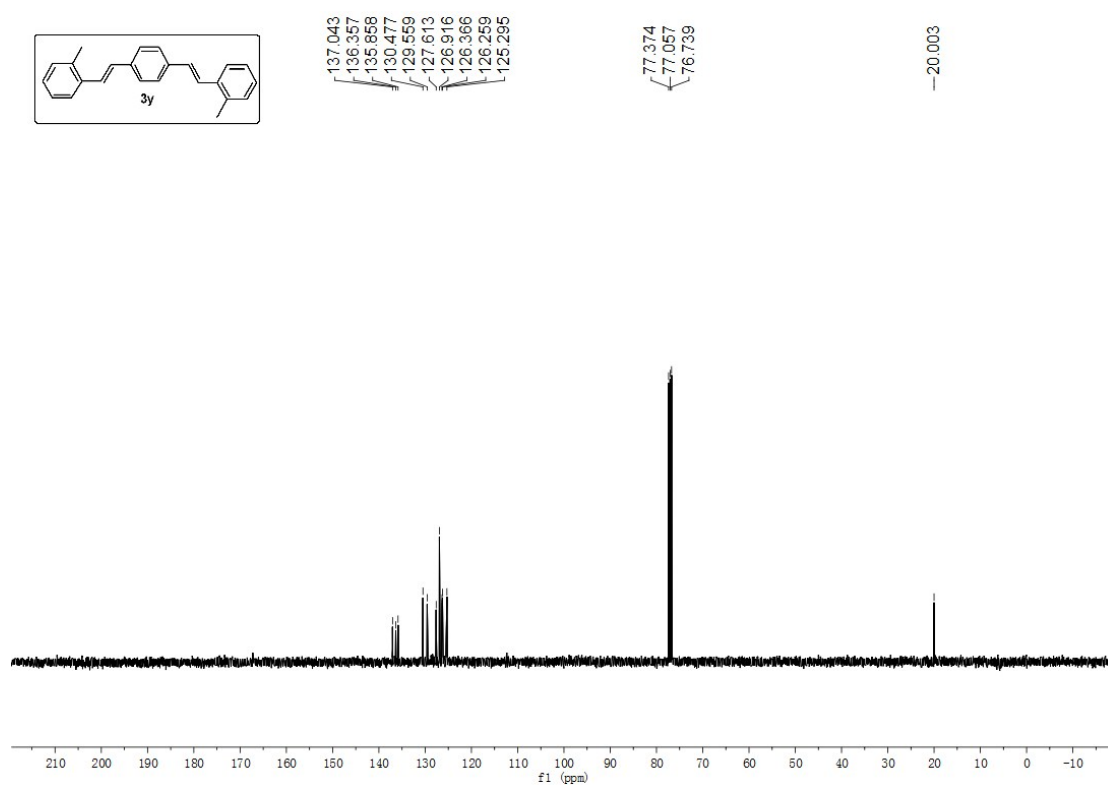

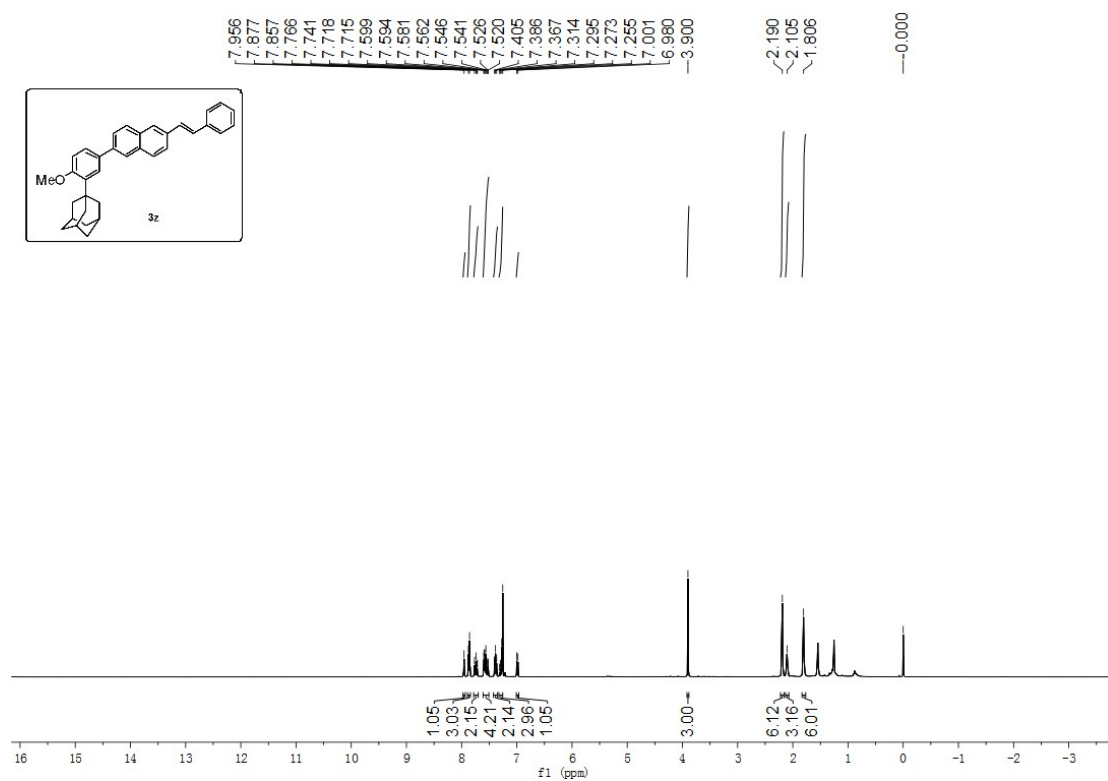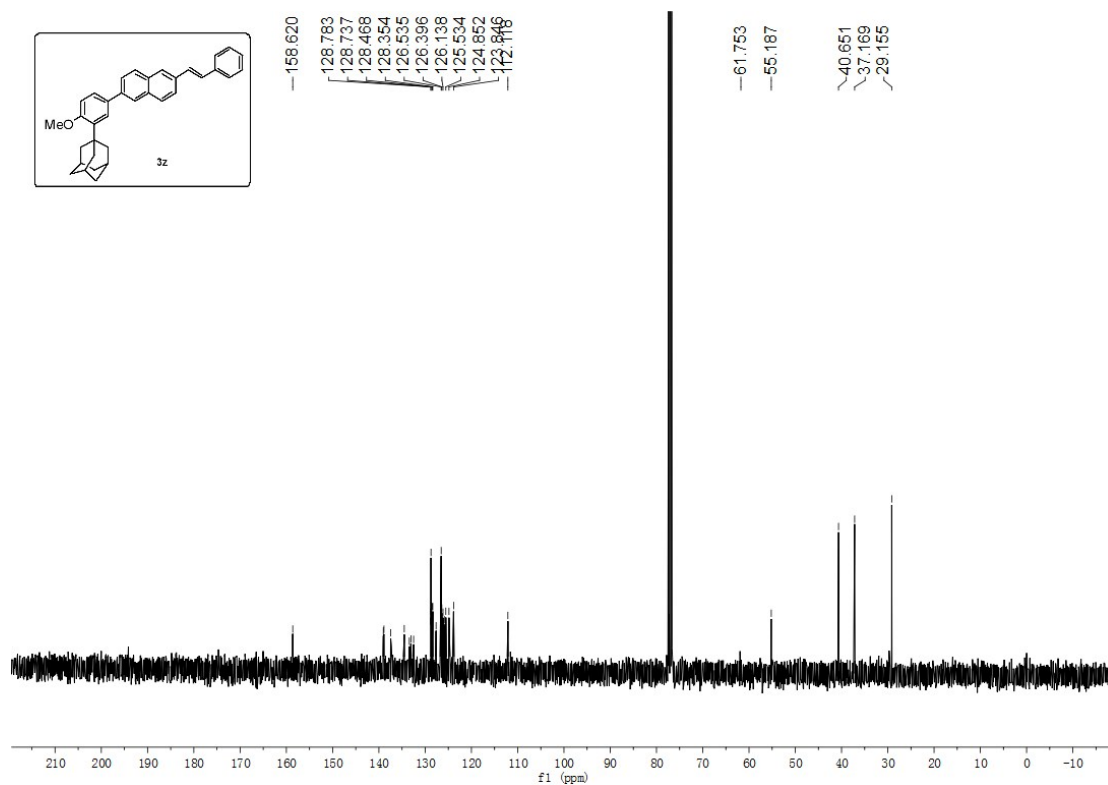

Supplement: c5cc10005d1.pdf [file c5cc10005d1.pdf]
